# Supplementary material
Source: publisher figshare collection journal article supplement (https://future-science-group.figshare.com/articles/dataset/_/20746831)
Supplement: Supplementary file 1 [file 1]

| name      | haplotype 1 | haplotype 2 | score | haplotype 1 | score   | haplotype 2 | score   | activity                 | phenotype | CNV with xHMM | haplotype 1 revised | haplotype 2 revised | genotype | score   | activity | revised | phenotype                | revised |
|-----------|-------------|-------------|-------|-------------|---------|-------------|---------|--------------------------|-----------|---------------|---------------------|---------------------|----------|---------|----------|---------|--------------------------|---------|
| dijex3639 | *2          | *35         | 1.0   | 1.0         | 2.0     | 2.0         | 2.0     | normal_metabolizer       |           |               | *2                  | *35                 | *2/*35   | 2.0     |          |         | normal_metabolizer       |         |
| dijex3640 | *3          | *4          | 0.0   | 0.0         | 0.0     | 0.0         | 0.0     | poor_metabolizer         |           |               | *3                  | *4                  | *3/*4    | 0.0     |          |         | poor_metabolizer         |         |
| dijex3641 | *1          | *41         | 1.0   | 0.5         | 1.5     | 1.5         | 1.5     | normal_metabolizer       |           |               | *1                  | *41                 | *1/*41   | 1.5     |          |         | normal_metabolizer       |         |
| dijex3642 | *1          | *4          | 1.0   | 0.0         | 1.0     | 1.0         | 1.0     | intermediate_metabolizer |           |               | *1                  | *4                  | *1/*4    | 1.0     |          |         | intermediate_metabolizer |         |
| dijex3643 | *1          | *127        | 1.0   | unknown     | unknown | unknown     | unknown | unknown                  |           |               | *1                  | *127                | *1/*127  | unknown |          |         | unknown                  |         |
| dijex3644 | *1          | *122        | 1.0   | unknown     | unknown | unknown     | unknown | unknown                  |           |               | *1                  | *122                | *1/*122  | unknown |          |         | unknown                  |         |
| dijex3645 | *1          | *122        | 1.0   | unknown     | unknown | unknown     | unknown | unknown                  |           |               | *1                  | *122                | *1/*122  | unknown |          |         | unknown                  |         |
| dijex3646 | *41         | *41         | 0.5   | 0.5         | 1.0     | 1.0         | 1.0     | intermediate_metabolizer |           |               | *41                 | *41                 | *41/*41  | 1.0     |          |         | intermediate_metabolizer |         |
| dijex3647 | *3          | *4          | 0.0   | 0.0         | 0.0     | 0.0         | 0.0     | poor_metabolizer         |           |               | *3                  | *4                  | *3/*4    | 0.0     |          |         | poor_metabolizer         |         |
| dijex3648 | *1          | *35         | 1.0   | 1.0         | 2.0     | 2.0         | 2.0     | normal_metabolizer       |           |               | *1                  | *35                 | *1/*35   | 2.0     |          |         | normal_metabolizer       |         |
| dijex3649 | *1          | *122        | 1.0   | unknown     | unknown | unknown     | unknown | unknown                  |           |               | *1                  | *122                | *1/*122  | unknown |          |         | unknown                  |         |
| dijex3650 | *2          | *17         | 1.0   | 0.5         | 1.5     | 1.5         | 1.5     | normal_metabolizer       |           |               | *2                  | *17                 | *2/*17   | 1.5     |          |         | normal_metabolizer       |         |
| dijex3651 | *1          | *4          | 1.0   | 0.0         | 1.0     | 1.0         | 1.0     | intermediate_metabolizer |           |               | *1                  | *4                  | *1/*4    | 1.0     |          |         | intermediate_metabolizer |         |
| dijex3652 | *2          | *41         | 1.0   | 0.5         | 1.5     | 1.5         | 1.5     | normal_metabolizer       |           |               | *2                  | *41                 | *2/*41   | 1.5     |          |         | normal_metabolizer       |         |
| dijex3653 | *1          | *20         | 1.0   | 0.0         | 1.0     | 1.0         | 1.0     | intermediate_metabolizer |           |               | *1                  | *20                 | *1/*20   | 1.0     |          |         | intermediate_metabolizer |         |
| dijex3654 | *2          | *2          | 1.0   | 1.0         | 2.0     | 2.0         | 2.0     | normal_metabolizer       |           |               | *2                  | *2                  | *2/*2    | 2.0     |          |         | normal_metabolizer       |         |
| dijex3655 | *1          | *127        | 1.0   | unknown     | unknown | unknown     | unknown | unknown                  |           |               | *1                  | *127                | *1/*127  | unknown |          |         | unknown                  |         |
| dijex3656 | *1          | *4          | 1.0   | 0.0         | 1.0     | 1.0         | 1.0     | intermediate_metabolizer |           |               | *1                  | *4                  | *1/*4    | 1.0     |          |         | intermediate_metabolizer |         |
| dijex3657 | *1          | *2          | 1.0   | 1.0         | 2.0     | 2.0         | 2.0     | normal_metabolizer       |           |               | *1                  | *2                  | *1/*2    | 2.0     |          |         | normal_metabolizer       |         |
| dijex3658 | *2          | *2          | 1.0   | 1.0         | 2.0     | 2.0         | 2.0     | normal_metabolizer       |           |               | *2                  | *2                  | *2/*2    | 2.0     |          |         | normal_metabolizer       |         |
| dijex3659 | *1          | *35         | 1.0   | 1.0         | 2.0     | 2.0         | 2.0     | normal_metabolizer       |           |               | *1                  | *35                 | *1/*35   | 2.0     |          |         | normal_metabolizer       |         |
| dijex3660 | *1          | *2          | 1.0   | 1.0         | 2.0     | 2.0         | 2.0     | normal_metabolizer       |           |               | *1                  | *2                  | *1/*2    | 2.0     |          |         | normal_metabolizer       |         |
| dijex3661 | *4          | *41         | 0.0   | 0.5         | 0.5     | 0.5         | 0.5     | intermediate_metabolizer |           |               | *4                  | *41                 | *4/*41   | 0.5     |          |         | intermediate_metabolizer |         |
| dijex3662 | *1          | *122        | 1.0   | unknown     | unknown | unknown     | unknown | unknown                  |           |               | *1                  | *122                | *1/*122  | unknown |          |         | unknown                  |         |
| dijex3663 | *1          | *122        | 1.0   | unknown     | unknown | unknown     | unknown | unknown                  |           |               | *1                  | *122                | *1/*122  | unknown |          |         | unknown                  |         |
| dijex3664 | *41         | *122        | 0.5   | unknown     | unknown | unknown     | unknown | unknown                  |           |               | *41                 | *122                | *41/*122 | unknown |          |         | unknown                  |         |
| dijex3665 | *34         | *122        | 1.0   | unknown     | unknown | unknown     | unknown | unknown                  |           |               | *34                 | *122                | *34/*122 | unknown |          |         | unknown                  |         |
| dijex3666 | *1          | *41         | 1.0   | 0.5         | 1.5     | 1.5         | 1.5     | normal_metabolizer       |           |               | *1                  | *41                 | *1/*41   | 1.5     |          |         | normal_metabolizer       |         |
| dijex3667 | *1          | *122        | 1.0   | unknown     | unknown | unknown     | unknown | unknown                  |           |               | *1                  | *122                | *1/*122  | unknown |          |         | unknown                  |         |
| dijex3668 | *1          | *35         | 1.0   | 1.0         | 2.0     | 2.0         | 2.0     | normal_metabolizer       |           |               | *1                  | *35                 | *1/*35   | 2.0     |          |         | normal_metabolizer       |         |
| dijex3669 | *1          | *127        | 1.0   | unknown     | unknown | unknown     | unknown | unknown                  |           |               | *1                  | *127                | *1/*127  | unknown |          |         | unknown                  |         |
| dijex3670 | *1          | *4          | 1.0   | 0.0         | 1.0     | 1.0         | 1.0     | intermediate_metabolizer |           |               | *1                  | *4                  | *1/*4    | 1.0     |          |         | intermediate_metabolizer |         |
| dijex3671 | *10         | *10         | 0.25  | 0.25        | 0.5     | 0.5         | 0.5     | intermediate_metabolizer |           |               | *10                 | *10                 | *10/*10  | 0.5     |          |         | intermediate_metabolizer |         |
| dijex3672 | *1          | *15         | 1.0   | 0.0         | 1.0     | 1.0         | 1.0     | intermediate_metabolizer |           |               | *1                  | *15                 | *1/*15   | 1.0     |          |         | intermediate_metabolizer |         |
| dijex3673 | *1          | *2          | 1.0   | 1.0         | 2.0     | 2.0         | 2.0     | normal_metabolizer       |           |               | *1                  | *2                  | *1/*2    | 2.0     |          |         | normal_metabolizer       |         |
| dijex3674 | *4          | *10         | 0.0   | 0.25        | 0.25    | 0.25        | 0.25    | intermediate_metabolizer |           |               | *4                  | *10                 | *4/*10   | 0.25    |          |         | intermediate_metabolizer |         |
| dijex3675 | *1          | *122        | 1.0   | unknown     | unknown | unknown     | unknown | unknown                  |           |               | *1                  | *122                | *1/*122  | unknown |          |         | unknown                  |         |
| dijex3676 | *1          | *1          | 1.0   | 1.0         | 2.0     | 2.0         | 2.0     | normal_metabolizer       |           |               | *1                  | *1                  | *1/*1    | 2.0     |          |         | normal_metabolizer       |         |
| dijex3677 | *1          | *22         | 1.0   | unknown     | unknown | unknown     | unknown | unknown                  |           |               | *1                  | *22                 | *1/*22   | unknown |          |         | unknown                  |         |
| dijex3678 | *1          | *3          | 1.0   | 0.0         | 1.0     | 1.0         | 1.0     | intermediate_metabolizer |           |               | *1                  | *3                  | *1/*3    | 1.0     |          |         | intermediate_metabolizer |         |
| dijex3679 | *1          | *122        | 1.0   | unknown     | unknown | unknown     | unknown | unknown                  |           |               | *1                  | *122                | *1/*122  | unknown |          |         | unknown                  |         |
| dijex3680 | *2          | *9          | 1.0   | 0.5         | 1.5     | 1.5         | 1.5     | normal_metabolizer       |           |               | *2                  | *9                  | *2/*9    | 1.5     |          |         | normal_metabolizer       |         |
| dijex3681 | *2          | *41         | 1.0   | 0.5         | 1.5     | 1.5         | 1.5     | normal_metabolizer       |           |               | *2                  | *41                 | *2/*41   | 1.5     |          |         | normal_metabolizer       |         |
| dijex3682 | *2          | *35         | 1.0   | 1.0         | 2.0     | 2.0         | 2.0     | normal_metabolizer       |           |               | *2                  | *35                 | *2/*35   | 2.0     |          |         | normal_metabolizer       |         |
| dijex3683 | *1          | *2          | 1.0   | 1.0         | 2.0     | 2.0         | 2.0     | normal_metabolizer       |           |               | *1                  | *2                  | *1/*2    | 2.0     |          |         | normal_metabolizer       |         |
| dijex3684 | *2          | *6          | 1.0   | 0.0         | 1.0     | 1.0         | 1.0     | intermediate_metabolizer |           |               | *2                  | *6                  | *2/*6    | 1.0     |          |         | intermediate_metabolizer |         |
| dijex3685 | *2          | *4          | 1.0   | 0.0         | 1.0     | 1.0         | 1.0     | intermediate_metabolizer |           |               | *2                  | *4                  | *2/*4    | 1.0     |          |         | intermediate_metabolizer |         |
| dijex3686 | *1          | *1          | 1.0   | 1.0         | 2.0     | 2.0         | 2.0     | normal_metabolizer       | DUP       |               | *1x2                | *1                  | *1x2/*1  | 3.0     |          |         | ultrarapid_metabolizer   |         |
| dijex3687 | *1          | *1          | 1.0   | 1.0         | 2.0     | 2.0         | 2.0     | normal_metabolizer       |           |               | *1                  | *1                  | *1/*1    | 2.0     |          |         | normal_metabolizer       |         |
| dijex3688 | *2          | *2          | 1.0   | 1.0         | 2.0     | 2.0         | 2.0     | normal_metabolizer       |           |               | *2                  | *2                  | *2/*2    | 2.0     |          |         | normal_metabolizer       |         |
| dijex3689 | *2          | *9          | 1.0   | 0.5         | 1.5     | 1.5         | 1.5     | normal_metabolizer       | DUP       |               | *2x2                | *9                  | *2x2/*9  | 2.5     |          |         | ultrarapid_metabolizer   |         |
| dijex3690 | *2          | *2          | 1.0   | 1.0         | 2.0     | 2.0         | 2.0     | normal_metabolizer       |           |               | *2                  | *2                  | *2/*2    | 2.0     |          |         | normal_metabolizer       |         |
| dijex3691 | *1          | *4          | 1.0   | 0.0         | 1.0     | 1.0         | 1.0     | intermediate_metabolizer |           |               | *1                  | *4                  | *1/*4    | 1.0     |          |         | intermediate_metabolizer |         |
| dijex3692 | *10         | *41         | 0.25  | 0.5         | 0.75    | 0.75        | 0.75    | intermediate_metabolizer |           |               | *10                 | *41                 | *10/*41  | 0.75    |          |         | intermediate_metabolizer |         |
| dijex3693 | *2          | *106        | 1.0   | unknown     | unknown | unknown     | unknown | unknown                  |           |               | *2                  | *106                | *2/*106  | unknown |          |         | unknown                  |         |
| dijex3694 | *4          | *4          | 0.0   | 0.0         | 0.0     | 0.0         | 0.0     | poor_metabolizer         | DUP       |               | *4                  | *5                  | *4/*5    | 0.0     |          |         | poor_metabolizer         |         |
| dijex3695 | *4          | *127        | 0.0   | unknown     | unknown | unknown     | unknown | unknown                  |           |               | *4                  | *127                | *4/*127  | unknown |          |         | unknown                  |         |
| dijex3696 | *2          | *4          | 1.0   | 0.0         | 1.0     | 1.0         | 1.0     | intermediate_metabolizer |           |               | *2                  | *4                  | *2/*4    | 1.0     |          |         | intermediate_metabolizer |         |
| dijex3697 | *2          | *2          | 1.0   | 1.0         | 2.0     | 2.0         | 2.0     | normal_metabolizer       |           |               | *2                  | *2                  | *2/*2    | 2.0     |          |         | normal_metabolizer       |         |
| dijex3698 | *1          | *4          | 1.0   | 0.0         | 1.0     | 1.0         | 1.0     | intermediate_metabolizer |           |               | *1                  | *4                  | *1/*4    | 1.0     |          |         | intermediate_metabolizer |         |
| dijex3699 | *1          | *4          | 1.0   | 0.0         | 1.0     | 1.0         | 1.0     | intermediate_metabolizer |           |               | *1                  | *4                  | *1/*4    | 1.0     |          |         | intermediate_metabolizer |         |
| dijex3700 | *2          | *2          | 1.0   | 1.0         | 2.0     | 2.0         | 2.0     | normal_metabolizer       |           |               | *2                  | *2                  | *2/*2    | 2.0     |          |         | normal_metabolizer       |         |
| dijex3701 | *2          | *2          | 1.0   | 1.0         | 2.0     | 2.0         | 2.0     | normal_metabolizer       |           |               | *2                  | *2                  | *2/*2    | 2.0     |          |         | normal_metabolizer       |         |
| dijex3702 | *4          | *6          | 0.0   | 0.0         | 0.0     | 0.0         | 0.0     | poor_metabolizer         |           |               | *4                  | *6                  | *4/*6    | 0.0     |          |         | poor_metabolizer         |         |
| dijex3703 | *41         | *41         | 0.5   | 0.5         | 1.0     | 1.0         | 1.0     | intermediate_metabolizer |           |               | *41                 | *41                 | *41/*41  | 1.0     |          |         | intermediate_metabolizer |         |
| dijex3704 | *1          | *122        | 1.0   | unknown     | unknown | unknown     | unknown | unknown                  |           |               | *1                  | *122                | *1/*122  | unknown |          |         | unknown                  |         |
| dijex3705 | *4          | *4          | 0.0   | 0.0         | 0.0     | 0.0         | 0.0     | poor_metabolizer         |           |               | *4                  | *4                  | *4/*4    | 0.0     |          |         | poor_metabolizer         |         |
| dijex3706 | *1          | *4          | 1.0   | 0.0         | 1.0     | 1.0         | 1.0     | intermediate_metabolizer |           |               | *1                  | *4                  | *1/*4    | 1.0     |          |         | intermediate_metabolizer |         |
| dijex3707 | *2          | *41         | 1.0   | 0.5         | 1.5     | 1.5         | 1.5     | normal_metabolizer       |           |               | *2                  | *41                 | *2/*41   | 1.5     |          |         | normal_metabolizer       |         |
| dijex3708 | *6          | *41         | 0.0   | 0.5         | 0.5     | 0.5         | 0.5     | intermediate_metabolizer |           |               | *6                  | *41                 | *6/*41   | 0.5     |          |         | intermediate_metabolizer |         |
| dijex3709 | *33         | *35         | 1.0   | 1.0         | 2.0     | 2.0         | 2.0     | normal_metabolizer       |           |               | *33                 | *35                 | *33/*35  | 2.0     |          |         | normal_metabolizer       |         |
| dijex3710 | *1          | *122        | 1.0   | unknown     | unknown | unknown     | unknown | unknown                  |           |               | *1                  | *122                | *1/*122  | unknown |          |         | unknown                  |         |
| dijex3711 | *1          | *2          | 1.0   | 1.0         | 2.0     | 2.0         | 2.0     | normal_metabolizer       |           |               | *1                  | *2                  | *1/*2    | 2.0     |          |         | normal_metabolizer       |         |
| dijex3712 | *1          | *41         | 1.0   | 0.5         | 1.5     | 1.5         | 1.5     | normal_metabolizer       |           |               | *1                  | *41                 | *1/*41   | 1.5     |          |         | normal_metabolizer       |         |
| dijex3713 | *35         | *35         | 1.0   | 1.0         | 2.0     | 2.0         | 2.0     | normal_metabolizer       |           |               | *35                 | *35                 | *35/*35  | 2.0     |          |         | normal_metabolizer       |         |
| dijex3714 | *1          | *4          | 1.0   | 0.0         | 1.0     | 1.0         | 1.0     | intermediate_metabolizer |           |               | *1                  | *4                  | *1/*4    | 1.0     |          |         | intermediate_metabolizer |         |
| dijex3715 | *1          | *2          | 1.0   | 1.0         | 2.0     | 2.0         | 2.0     | normal_metabolizer       |           |               | *1                  | *2                  | *1/*2    | 2.0     |          |         | normal_metabolizer       |         |
| dijex3716 | *4          | *116        | 0.0   | unknown     | unknown | unknown     | unknown | unknown                  |           |               | *4                  | *116                | *4/*116  | unknown |          |         | unknown                  |         |
| dijex3717 | *35         | *122        | 1.0   | unknown     | unknown | unknown     | unknown | unknown                  |           |               | *35                 | *122                | *35/*122 | unknown |          |         | unknown                  |         |
| dijex3718 | *4          | *127        | 0.0   | unknown     | unknown | unknown     | unknown | unknown                  |           |               | *4                  | *127                | *4/*127  | unknown |          |         | unknown                  |         |
| dijex3719 | *1          | *4          | 1.0   | 0.0         | 1.0     | 1.0         | 1.0     | intermediate_metabolizer |           |               | *1                  | *4                  | *1/*4    | 1.0     |          |         | intermediate_metabolizer |         |
| dijex3720 | *41         | *41         | 0.5   | 0.5         | 1.0     | 1.0         | 1.0     | intermediate_metabolizer |           |               | *41                 | *41                 | *41/*41  | 1.0     |          |         | intermediate_metabolizer |         |
| dijex3721 | *2          | *4          | 1.0   | 0.0         | 1.0     | 1.0         | 1.0     | intermediate_metabolizer |           |               | *2                  | *4                  | *2/*4    | 1.0     |          |         | intermediate_metabolizer |         |
| dijex3722 | *2          | *4          | 1.0   | 0.0         | 1.0     | 1.0         | 1.0     | intermediate_metabolizer |           |               | *2                  | *4                  | *2/*4    | 1.0     |          |         | intermediate_metabolizer |         |
| dijex3723 | *1          | *4          | 1.0   | 0.0         | 1.0     | 1.0         | 1.0     | intermediate_metabolizer |           |               | *1                  | *4                  | *1/*4    | 1.0     |          |         | intermediate_metabolizer |         |
| dijex3724 | *4          | *127        | 0.0   | unknown     | unknown | unknown     | unknown | unknown                  |           |               | *4                  | *127                | *4/*127  | unknown |          |         | unknown                  |         |
| dijex3725 | *1          | *35         | 1.0   | 1.0         | 2.0     | 2.0         | 2.0     | normal_metabolizer       |           |               | *1                  | *35                 | *1/*35   | 2.0     |          |         | normal_metabolizer       |         |
| dijex3726 | *4          | *22         | 0.0   | unknown     | unknown | unknown     | unknown | unknown                  |           |               | *4                  | *22                 | *4/*22   | unknown |          |         | unknown                  |         |
| dijex3727 | *2          | *4          | 1.0   | 0.0         | 1.0     | 1.0         | 1.0     | intermediate_metabolizer |           |               | *2                  | *4                  | *2/*4    | 1.0     |          |         | intermediate_metabolizer |         |
| dijex3728 | *1          | *2          | 1.0   | 1.0         | 2.0     | 2.0         | 2.0     | normal_metabolizer       |           |               | *1                  | *2                  | *1/*2    | 2.0     |          |         | normal_metabolizer       |         |
| dijex3729 | *1          | *122        | 1.0   | unknown     | unknown | unknown     | unknown | unknown                  |           |               | *1                  | *122                | *1/*122  | unknown |          |         | unknown                  |         |
| dijex3730 |             |             |       |             |         |             |         |                          |           |               |                     |                     |          |         |          |         |                          |         |

|           |     |      |      |         |                          |                          |      |       |          |           |                          |                          |
|-----------|-----|------|------|---------|--------------------------|--------------------------|------|-------|----------|-----------|--------------------------|--------------------------|
| dijex3752 | *2  | 1.0  | 1.0  | 2.0     | normal_metabolizer       | DUP                      | *2x2 | *2    | *2x2*2   | 3.0       | ultraprapid_metabolizer  |                          |
| dijex3754 | *1  | *35  | 1.0  | 1.0     | 2.0                      | normal_metabolizer       | *1   | *35   | *1/*35   | 2.0       | normal_metabolizer       |                          |
| dijex3755 | *4  | *35  | 0.0  | 1.0     | 1.0                      | intermediate_metabolizer | *4   | *35   | *4/*35   | 1.0       | intermediate_metabolizer |                          |
| dijex3756 | *1  | *4   | 1.0  | 0.0     | 1.0                      | intermediate_metabolizer | *1   | *4    | *1/*4    | 1.0       | intermediate_metabolizer |                          |
| dijex3757 | *1  | *35  | 1.0  | 1.0     | 2.0                      | normal_metabolizer       | *1   | *35   | *1/*35   | 2.0       | normal_metabolizer       |                          |
| dijex3758 | *2  | *41  | 1.0  | 0.5     | 1.5                      | normal_metabolizer       | *2   | *41   | *2/*41   | 1.5       | normal_metabolizer       |                          |
| dijex3759 | *1  | *1   | 1.0  | 1.0     | 2.0                      | normal_metabolizer       | *1   | *1    | *1/*1    | 2.0       | normal_metabolizer       |                          |
| dijex3760 | *1  | *4   | 1.0  | 0.0     | 1.0                      | intermediate_metabolizer | *1   | *4    | *1/*4    | 1.0       | intermediate_metabolizer |                          |
| dijex3761 | *1  | *35  | 1.0  | 1.0     | 2.0                      | normal_metabolizer       | *1   | *35   | *1/*35   | 2.0       | normal_metabolizer       |                          |
| dijex3762 | *1  | *122 | 1.0  | unknown | unknown                  | unknown                  | *1   | *122  | *1/*122  | unknown   | unknown                  |                          |
| dijex3763 | *2  | *4   | 1.0  | 0.0     | 1.0                      | intermediate_metabolizer | *2   | *4    | *2/*4    | 1.0       | intermediate_metabolizer |                          |
| dijex3764 | *2  | *4   | 1.0  | 0.0     | 1.0                      | intermediate_metabolizer | *2   | *4    | *2/*4    | 1.0       | intermediate_metabolizer |                          |
| dijex3765 | *1  | *41  | 1.0  | 0.5     | 1.5                      | normal_metabolizer       | *1   | *41   | *1/*41   | 1.5       | normal_metabolizer       |                          |
| dijex3766 | *41 | *127 | 0.5  | unknown | unknown                  | unknown                  | *41  | *127  | *41/*127 | unknown   | unknown                  |                          |
| dijex3767 | *35 | *41  | 1.0  | 0.5     | 1.5                      | normal_metabolizer       | *35  | *41   | *35/*41  | 1.5       | normal_metabolizer       |                          |
| dijex3768 | *2  | *9   | 1.0  | 0.5     | 1.5                      | normal_metabolizer       | *2   | *9    | *2/*9    | 1.5       | normal_metabolizer       |                          |
| dijex3769 | *2  | *4   | 1.0  | 0.0     | 1.0                      | intermediate_metabolizer | *2   | *4    | *2/*4    | 1.0       | intermediate_metabolizer |                          |
| dijex3770 | *1  | *1   | 1.0  | 1.0     | 2.0                      | normal_metabolizer       | *1   | *1    | *1/*1    | 2.0       | normal_metabolizer       |                          |
| dijex3771 | *1  | *4   | 1.0  | 0.0     | 1.0                      | intermediate_metabolizer | *1   | *4    | *1/*4    | 1.0       | intermediate_metabolizer |                          |
| dijex3772 | *41 | *122 | 0.5  | unknown | unknown                  | unknown                  | *41  | *122  | *41/*122 | unknown   | unknown                  |                          |
| dijex3773 | *4  | *4   | 0.0  | 0.0     | 0.0                      | poor_metabolizer         | *4   | *4    | *4/*4    | 0.0       | poor_metabolizer         |                          |
| dijex3774 | *31 | *41  | 0.0  | 0.5     | intermediate_metabolizer | intermediate_metabolizer | *31  | *41   | *31/*41  | 0.5       | intermediate_metabolizer |                          |
| dijex3775 | *2  | *127 | 1.0  | unknown | unknown                  | unknown                  | *2   | *127  | *2/*127  | unknown   | unknown                  |                          |
| dijex3776 | *1  | *41  | 1.0  | 0.5     | 1.5                      | normal_metabolizer       | *1   | *41   | *1/*41   | 1.5       | normal_metabolizer       |                          |
| dijex3777 | *4  | *4   | 0.0  | 0.0     | 0.0                      | poor_metabolizer         | *4   | *4    | *4/*4    | 0.0       | poor_metabolizer         |                          |
| dijex3778 | *1  | *122 | 1.0  | unknown | unknown                  | unknown                  | *1   | *122  | *1/*122  | unknown   | unknown                  |                          |
| dijex3779 | *1  | *41  | 1.0  | 0.5     | 1.5                      | normal_metabolizer       | *1   | *41   | *1/*41   | 1.5       | normal_metabolizer       |                          |
| dijex3779 | *4  | *4   | 0.0  | 0.0     | 0.0                      | poor_metabolizer         | *4   | *4    | *4/*4    | 0.0       | poor_metabolizer         |                          |
| dijex3778 | *1  | *122 | 1.0  | unknown | unknown                  | unknown                  | *1   | *122  | *1/*122  | unknown   | unknown                  |                          |
| dijex3779 | *1  | *41  | 1.0  | 0.5     | 1.5                      | normal_metabolizer       | *1   | *41   | *1/*41   | 1.5       | normal_metabolizer       |                          |
| dijex3780 | *4  | *41  | 0.0  | 0.5     | 0.5                      | intermediate_metabolizer | *4   | *41   | *4/*41   | 0.5       | intermediate_metabolizer |                          |
| dijex3781 | *1  | *41  | 1.0  | 0.5     | 1.5                      | normal_metabolizer       | *1   | *41   | *1/*41   | 1.5       | normal_metabolizer       |                          |
| dijex3782 | *1  | *22  | 1.0  | unknown | unknown                  | unknown                  | *1   | *22   | *1/*22   | unknown   | unknown                  |                          |
| dijex3783 | *4  | *41  | 0.0  | 0.5     | 0.5                      | intermediate_metabolizer | *4   | *41   | *4/*41   | 0.5       | intermediate_metabolizer |                          |
| dijex3784 | *1  | *41  | 1.0  | 0.5     | 1.5                      | normal_metabolizer       | *1   | *41   | *1/*41   | 1.5       | normal_metabolizer       |                          |
| dijex3785 | *1  | *35  | 1.0  | 1.0     | 2.0                      | normal_metabolizer       | *1   | *35   | *1/*35   | 2.0       | normal_metabolizer       |                          |
| dijex3786 | *4  | *35  | 0.0  | 1.0     | 1.0                      | intermediate_metabolizer | *4   | *35   | *4/*35   | 1.0       | intermediate_metabolizer |                          |
| dijex3787 | *1  | *9   | 1.0  | 0.5     | 1.5                      | normal_metabolizer       | *1   | *9    | *1/*9    | 1.5       | normal_metabolizer       |                          |
| dijex3788 | *1  | *122 | 1.0  | unknown | unknown                  | unknown                  | *1   | *122  | *1/*122  | unknown   | unknown                  |                          |
| dijex3789 | *2  | *41  | 1.0  | 0.5     | 1.5                      | normal_metabolizer       | *2   | *41   | *2/*41   | 1.5       | normal_metabolizer       |                          |
| dijex3790 | *2  | *2   | 1.0  | 1.0     | 2.0                      | normal_metabolizer       | *2   | *2    | *2/*2    | 2.0       | normal_metabolizer       |                          |
| dijex3791 | *4  | *41  | 0.0  | 0.5     | 0.5                      | intermediate_metabolizer | *4   | *41   | *4/*41   | 0.5       | intermediate_metabolizer |                          |
| dijex3792 | *1  | *1   | 1.0  | 1.0     | 2.0                      | normal_metabolizer       | *1   | *1    | *1/*1    | 2.0       | normal_metabolizer       |                          |
| dijex3793 | *2  | *35  | 1.0  | 1.0     | 2.0                      | normal_metabolizer       | *2   | *35   | *2/*35   | 2.0       | normal_metabolizer       |                          |
| dijex3794 | *2  | *35  | 1.0  | 1.0     | 2.0                      | normal_metabolizer       | *2   | *35   | *2/*35   | 2.0       | normal_metabolizer       |                          |
| dijex3795 | *2  | *35  | 1.0  | 1.0     | 2.0                      | normal_metabolizer       | *2   | *35   | *2/*35   | 2.0       | normal_metabolizer       |                          |
| dijex3796 | *1  | *2   | 1.0  | 1.0     | 2.0                      | normal_metabolizer       | *1   | *2    | *1/*2    | 2.0       | normal_metabolizer       |                          |
| dijex3797 | *4  | *4   | 0.0  | 0.0     | 0.0                      | poor_metabolizer         | *4   | *4    | *4/*4    | 0.0       | poor_metabolizer         |                          |
| dijex3798 | *1  | *1   | 1.0  | 1.0     | 2.0                      | normal_metabolizer       | *1   | *1    | *1/*1    | 2.0       | normal_metabolizer       |                          |
| dijex3799 | *1  | *2   | 1.0  | 1.0     | 2.0                      | normal_metabolizer       | *1   | *2    | *1/*2    | 2.0       | normal_metabolizer       |                          |
| dijex3800 | *1  | *33  | 1.0  | 1.0     | 2.0                      | normal_metabolizer       | *1   | *33   | *1/*33   | 2.0       | normal_metabolizer       |                          |
| dijex3801 | *2  | *9   | 1.0  | 0.5     | 1.5                      | normal_metabolizer       | *2x3 | *9    | *2x3*9   | 3.5       | ultraprapid_metabolizer  |                          |
| dijex3802 | *1  | *122 | 1.0  | unknown | unknown                  | unknown                  | *1   | *122  | *1/*122  | unknown   | unknown                  |                          |
| dijex3803 | *1  | *122 | 1.0  | unknown | unknown                  | unknown                  | *1   | *122  | *1/*122  | unknown   | unknown                  |                          |
| dijex3804 | *1  | *2   | 1.0  | 1.0     | 2.0                      | normal_metabolizer       | *1   | *2    | *1/*2    | 2.0       | normal_metabolizer       |                          |
| dijex3805 | *41 | *41  | 0.5  | 0.5     | 1.0                      | intermediate_metabolizer | *41  | *41   | *41/*41  | 1.0       | intermediate_metabolizer |                          |
| dijex3806 | *1  | *1   | 1.0  | 1.0     | 2.0                      | normal_metabolizer       | *1   | *1    | *1/*1    | 2.0       | normal_metabolizer       |                          |
| dijex3807 | *1  | *2   | 1.0  | 1.0     | 2.0                      | normal_metabolizer       | *1   | *2    | *1/*2    | 2.0       | normal_metabolizer       |                          |
| dijex3808 | *1  | *41  | 1.0  | 0.5     | 1.5                      | normal_metabolizer       | *1   | *41   | *1/*41   | 1.5       | normal_metabolizer       |                          |
| dijex3809 | *3  | *4   | 0.0  | 0.0     | 0.0                      | poor_metabolizer         | *3   | *4    | *3/*4    | 0.0       | poor_metabolizer         |                          |
| dijex3810 | *1  | *20  | 1.0  | 1.0     | 1.0                      | intermediate_metabolizer | *1   | *20   | *1/*20   | 1.0       | intermediate_metabolizer |                          |
| dijex3811 | *1  | *122 | 1.0  | unknown | unknown                  | unknown                  | *1   | *122  | *1/*122  | unknown   | unknown                  |                          |
| dijex3812 | *2  | *2   | 1.0  | 1.0     | 2.0                      | normal_metabolizer       | *2   | *2    | *2/*2    | 2.0       | normal_metabolizer       |                          |
| dijex3813 | *2  | *2   | 1.0  | 1.0     | 2.0                      | normal_metabolizer       | *2   | *2    | *2/*2    | 2.0       | normal_metabolizer       |                          |
| dijex3814 | *41 | *122 | 0.5  | unknown | unknown                  | unknown                  | *41  | *122  | *41/*122 | unknown   | unknown                  |                          |
| dijex3815 | *9  | *35  | 0.5  | 1.0     | 1.5                      | normal_metabolizer       | *9   | *35   | *9/*35   | 1.5       | normal_metabolizer       |                          |
| dijex3816 | *35 | *41  | 1.0  | 0.5     | 1.5                      | normal_metabolizer       | *35  | *41   | *35/*41  | 1.5       | normal_metabolizer       |                          |
| dijex3817 | *1  | *122 | 1.0  | unknown | unknown                  | unknown                  | *1   | *122  | *1/*122  | unknown   | unknown                  |                          |
| dijex3818 | *1  | *122 | 1.0  | unknown | unknown                  | unknown                  | *1   | *122  | *1/*122  | unknown   | unknown                  |                          |
| dijex3819 | *1  | *22  | 1.0  | unknown | unknown                  | unknown                  | *1   | *22   | *1/*22   | unknown   | unknown                  |                          |
| dijex3820 | *2  | *9   | 1.0  | 0.5     | 1.5                      | normal_metabolizer       | *2   | *9    | *2/*9    | 1.5       | normal_metabolizer       |                          |
| dijex3821 | *2  | *41  | 1.0  | 0.5     | 1.5                      | normal_metabolizer       | *2   | *41   | *2/*41   | 1.5       | normal_metabolizer       |                          |
| dijex3822 | *1  | *122 | 1.0  | unknown | unknown                  | unknown                  | *1   | *122  | *1/*122  | unknown   | unknown                  |                          |
| dijex3823 | *9  | *41  | 0.5  | 0.5     | 1.0                      | intermediate_metabolizer | *9   | *41   | *9/*41   | 1.0       | intermediate_metabolizer |                          |
| dijex3824 | *4  | *41  | 0.0  | 0.5     | 0.5                      | intermediate_metabolizer | *4   | *41   | *4/*41   | 0.5       | intermediate_metabolizer |                          |
| dijex3825 | *1  | *4   | 1.0  | 0.0     | 1.0                      | intermediate_metabolizer | *1   | *4    | *1/*4    | 1.0       | intermediate_metabolizer |                          |
| dijex3826 | *35 | *35  | 1.0  | 1.0     | 2.0                      | normal_metabolizer       | *35  | *35   | *35/*35  | 2.0       | normal_metabolizer       |                          |
| dijex3827 | *3  | *4   | 0.0  | 0.0     | 0.0                      | poor_metabolizer         | *3   | *4    | *3/*4    | 0.0       | poor_metabolizer         |                          |
| dijex3828 | *1  | *4   | 1.0  | 0.0     | 1.0                      | intermediate_metabolizer | *1   | *4    | *1/*4    | 1.0       | intermediate_metabolizer |                          |
| dijex3829 | *1  | *3   | 1.0  | 0.0     | 1.0                      | intermediate_metabolizer | *1   | *3    | *1/*3    | 1.0       | intermediate_metabolizer |                          |
| dijex3830 | *1  | *2   | 1.0  | 1.0     | 2.0                      | normal_metabolizer       | *1   | *2    | *1/*2    | 2.0       | normal_metabolizer       |                          |
| dijex3831 | *1  | *122 | 1.0  | unknown | unknown                  | unknown                  | *1   | *122  | *1/*122  | unknown   | unknown                  |                          |
| dijex3832 | *35 | *127 | 1.0  | unknown | unknown                  | unknown                  | *35  | *127  | *35/*127 | unknown   | unknown                  |                          |
| dijex3833 | *1  | *3   | 1.0  | 0.0     | 1.0                      | intermediate_metabolizer | *1   | *3    | *1/*3    | 1.0       | intermediate_metabolizer |                          |
| dijex3834 | *1  | *4   | 1.0  | 0.0     | 1.0                      | intermediate_metabolizer | *1   | *4    | *1/*4    | 1.0       | intermediate_metabolizer |                          |
| dijex3835 | *1  | *122 | 1.0  | unknown | unknown                  | unknown                  | *1   | *122  | *1/*122  | unknown   | unknown                  |                          |
| dijex3836 | *1  | *2   | 1.0  | 1.0     | 2.0                      | normal_metabolizer       | *1   | *2    | *1/*2    | 2.0       | normal_metabolizer       |                          |
| dijex3837 | *41 | *122 | 0.5  | unknown | unknown                  | unknown                  | *41  | *122  | *41/*122 | unknown   | unknown                  |                          |
| dijex3838 | *41 | *43  | 0.5  | unknown | unknown                  | unknown                  | *41  | *43   | *41/*43  | unknown   | unknown                  |                          |
| dijex3839 | *1  | *41  | 1.0  | 0.5     | 1.5                      | normal_metabolizer       | *1   | *41   | *1/*41   | 1.5       | normal_metabolizer       |                          |
| dijex3840 | *1  | *35  | 1.0  | 1.0     | 2.0                      | normal_metabolizer       | *1   | *35   | *1/*35   | 2.0       | normal_metabolizer       |                          |
| dijex3841 | *2  | *41  | 1.0  | 0.5     | 1.5                      | normal_metabolizer       | *2   | *41   | *2/*41   | 1.5       | normal_metabolizer       |                          |
| dijex3842 | *4  | *4   | 0.0  | 0.0     | 0.0                      | poor_metabolizer         | *4   | *4    | *4/*4    | 0.0       | poor_metabolizer         |                          |
| dijex3843 | *1  | *41  | 1.0  | 0.5     | 1.5                      | normal_metabolizer       | *1   | *41   | *1/*41   | 1.5       | normal_metabolizer       |                          |
| dijex3844 | *1  | *1   | 1.0  | 1.0     | 2.0                      | normal_metabolizer       | *1   | *1    | *1/*1    | 2.0       | normal_metabolizer       |                          |
| dijex3845 | *1  | *4   | 1.0  | 0.0     | 1.0                      | intermediate_metabolizer | *1   | *4    | *1/*4    | 1.0       | intermediate_metabolizer |                          |
| dijex3846 | *1  | *4   | 1.0  | 0.0     | 1.0                      | intermediate_metabolizer | *1   | *4    | *1/*4    | 1.0       | intermediate_metabolizer |                          |
| dijex3847 | *2  | *4   | 1.0  | 0.0     | 1.0                      | intermediate_metabolizer | *2   | *4    | *2/*4    | 1.0       | intermediate_metabolizer |                          |
| dijex3848 | *35 | *35  | 1.0  | 1.0     | 2.0                      | normal_metabolizer       | *35  | *35   | *35/*35  | 2.0       | normal_metabolizer       |                          |
| dijex3849 | *4  | *4   | 0.0  | 0.0     | 0.0                      | poor_metabolizer         | *4   | *5    | *4/*5    | 0.0       | poor_metabolizer         |                          |
| dijex3850 | *1  | *2   | 1.0  | 1.0     | 2.0                      | normal_metabolizer       | *1   | *2    | *1/*2    | 2.0       | normal_metabolizer       |                          |
| dijex3851 | *1  | *2   | 1.0  | 1.0     | 2.0                      | normal_metabolizer       | *1   | *2    | *1/*2    | 2.0       | normal_metabolizer       |                          |
| dijex3852 | *1  | *122 | 1.0  | unknown | unknown                  | unknown                  | *1   | *122  | *1/*122  | unknown   | unknown                  |                          |
| dijex3853 | *1  | *7   | 1.0  | 0.0     | 1.0                      | intermediate_metabolizer | *1   | *7    | *1/*7    | 1.0       | intermediate_metabolizer |                          |
| dijex3854 | *1  | *2   | 1.0  | 1.0     | 2.0                      | normal_metabolizer       | *1   | *2    | *1/*2    | 2.0       | normal_metabolizer       |                          |
| dijex3855 | *1  | *122 | 1.0  | unknown | unknown                  | unknown                  | *1   | *122  | *1/*122  | unknown   | unknown                  |                          |
| dijex3856 | *1  | *122 | 1.0  | unknown | unknown                  | unknown                  | *1   | *122  | *1/*122  | unknown   | unknown                  |                          |
| dijex3857 | *1  | *4   | 1.0  | 0.0     | 1.0                      | intermediate_metabolizer | *1   | *4    | *1/*4    | 1.0       | intermediate_metabolizer |                          |
| dijex3858 | *4  | *4   | 0.0  | 0.0     | 0.0                      | poor_metabolizer         | *4   | *4    | *4/*4    | 0.0       | poor_metabolizer         |                          |
| dijex3859 | *1  | *1   | 1.0  | 1.0     | 2.0                      | normal_metabolizer       | *1   | *1    | *1/*1    | 2.0       | normal_metabolizer       |                          |
| dijex3860 | *10 | *10  | 0.25 | 0.25    | 0.5                      | intermediate_metabolizer | DUP  | *10x2 | *10      | *10x2/*10 | 0.75                     | intermediate_metabolizer |
| dijex3861 | *1  | *127 | 1.0  | unknown | unknown                  | unknown                  | *1   | *127  | *1/*127  | unknown   | unknown                  |                          |
| dijex3862 | *41 | *41  | 0.5  | 0.5     | 1.0                      | intermediate_metabolizer | *41  | *41   | *41/*41  | 1.0       | intermediate_metabolizer |                          |
| dijex3863 | *1  | *4   | 1.0  | 0.0     | 1.0                      | intermediate_metabolizer | DEL  | *1    | *4       | *1/*4     | 1.0                      | intermediate_metabolizer |
| dijex3864 | *4  | *35  | 0.0  | 1.0     | 1.0                      | intermediate_metabolizer | *4   | *35   | *4/*35   | 1.0       | intermediate_metabolizer |                          |
| dijex3865 | *4  | *10  | 0.0  | 0.25    | 0.25                     | intermediate_metabolizer | DEL  | *4    | *10      | *4/*10    | 0.25                     | intermediate_metabolizer |
| dijex3866 | *4  | *41  | 0.0  | 0.5     | 0.5                      | intermediate_metabolizer | *4   | *41   | *4/*41   | 0.5       | intermediate_metabolizer |                          |
| dijex3867 | *1  | *41  | 1.0  | 0.5     | 1.5                      | normal_metabolizer       | *1   | *41   | *1/*41   | 1.5       | normal_metabolizer       |                          |

|           |     |      |      |         |         |                          |     |       |          |           |                          |                          |
|-----------|-----|------|------|---------|---------|--------------------------|-----|-------|----------|-----------|--------------------------|--------------------------|
| dijex3868 | *1  | *122 | 1.0  | unknown | unknown | unknown                  | *1  | *122  | *1/*122  | unknown   | unknown                  |                          |
| dijex3869 | *35 | *35  | 1.0  | 1.0     | 2.0     | normal_metabolizer       | DEL | *5    | *5/*35   | 1.0       | intermediate_metabolizer |                          |
| dijex3870 | *4  | *10  | 0.0  | 0.25    | 0.25    | intermediate_metabolizer |     | *4    | *10      | *4/*10    | 0.25                     | intermediate_metabolizer |
| dijex3871 | *4  | *8   | 0.0  | 0.0     | 0.0     | poor_metabolizer         |     | *4    | *8       | *4/*8     | 0.0                      | poor_metabolizer         |
| dijex3872 | *4  | *10  | 0.0  | 0.25    | 0.25    | intermediate_metabolizer |     | *4    | *10      | *4/*10    | 0.25                     | intermediate_metabolizer |
| dijex3873 | *1  | *2   | 1.0  | 1.0     | 2.0     | normal_metabolizer       |     | *1    | *2       | *1/*2     | 2.0                      | normal_metabolizer       |
| dijex3874 | *4  | *35  | 0.0  | 1.0     | 1.0     | intermediate_metabolizer |     | *4    | *35      | *4/*35    | 1.0                      | intermediate_metabolizer |
| dijex3875 | *41 | *122 | 0.5  | unknown | unknown | unknown                  | *41 | *122  | *41/*122 | unknown   | unknown                  |                          |
| dijex3876 | *1  | *4   | 1.0  | 0.0     | 1.0     | intermediate_metabolizer |     | *1    | *4       | *1/*4     | 1.0                      | intermediate_metabolizer |
| dijex3877 | *1  | *9   | 1.0  | 0.5     | 1.5     | normal_metabolizer       |     | *1    | *9       | *1/*9     | 1.5                      | normal_metabolizer       |
| dijex3878 | *1  | *4   | 1.0  | 0.0     | 1.0     | intermediate_metabolizer |     | *1    | *4       | *1/*4     | 1.0                      | intermediate_metabolizer |
| dijex3879 | *2  | *2   | 1.0  | 1.0     | 2.0     | normal_metabolizer       |     | *2    | *2       | *2/*2     | 2.0                      | normal_metabolizer       |
| dijex3880 | *35 | *41  | 1.0  | 0.5     | 1.5     | normal_metabolizer       |     | *35   | *41      | *35/*41   | 1.5                      | normal_metabolizer       |
| dijex3881 | *2  | *2   | 1.0  | 1.0     | 2.0     | normal_metabolizer       |     | *2    | *2       | *2/*2     | 2.0                      | normal_metabolizer       |
| dijex3882 | *2  | *10  | 1.0  | 0.25    | 1.25    | normal_metabolizer       |     | *2    | *10      | *2/*10    | 1.25                     | normal_metabolizer       |
| dijex3883 | *1  | *2   | 1.0  | 1.0     | 2.0     | normal_metabolizer       |     | *1    | *2       | *1/*2     | 2.0                      | normal_metabolizer       |
| dijex3884 | *2  | *2   | 1.0  | 1.0     | 2.0     | normal_metabolizer       |     | *2    | *2       | *2/*2     | 2.0                      | normal_metabolizer       |
| dijex3885 | *2  | *4   | 1.0  | 0.0     | 1.0     | intermediate_metabolizer |     | *2    | *4       | *2/*4     | 1.0                      | intermediate_metabolizer |
| dijex3886 | *1  | *2   | 1.0  | 1.0     | 2.0     | normal_metabolizer       |     | *1    | *2       | *1/*2     | 2.0                      | normal_metabolizer       |
| dijex3887 | *10 | *10  | 0.25 | 0.25    | 0.5     | intermediate_metabolizer |     | *10   | *10      | *10/*10   | 0.5                      | intermediate_metabolizer |
| dijex3888 | *1  | *1   | 1.0  | 1.0     | 2.0     | normal_metabolizer       |     | *1    | *1       | *1/*1     | 2.0                      | normal_metabolizer       |
| dijex3889 | *1  | *122 | 1.0  | unknown | unknown | unknown                  | *1  | *122  | *1/*122  | unknown   | unknown                  |                          |
| dijex3890 | *1  | *122 | 1.0  | unknown | unknown | unknown                  | *1  | *122  | *1/*122  | unknown   | unknown                  |                          |
| dijex3891 | *1  | *9   | 1.0  | 0.5     | 1.5     | normal_metabolizer       |     | *1    | *9       | *1/*9     | 1.5                      | normal_metabolizer       |
| dijex3892 | *4  | *4   | 0.0  | 0.0     | 0.0     | poor_metabolizer         |     | *4    | *4       | *4/*4     | 0.0                      | poor_metabolizer         |
| dijex3893 | *2  | *29  | 1.0  | 0.5     | 1.5     | normal_metabolizer       |     | *2    | *29      | *2/*29    | 1.5                      | normal_metabolizer       |
| dijex3894 | *2  | *2   | 1.0  | 1.0     | 2.0     | normal_metabolizer       |     | *2    | *2       | *2/*2     | 2.0                      | normal_metabolizer       |
| dijex3895 | *1  | *122 | 1.0  | unknown | unknown | unknown                  | *1  | *122  | *1/*122  | unknown   | unknown                  |                          |
| dijex3896 | *35 | *41  | 1.0  | 0.5     | 1.5     | normal_metabolizer       |     | *35   | *41      | *35/*41   | 1.5                      | normal_metabolizer       |
| dijex3897 | *4  | *35  | 0.0  | 1.0     | 1.0     | intermediate_metabolizer |     | *4    | *35      | *4/*35    | 1.0                      | intermediate_metabolizer |
| dijex3898 | *35 | *35  | 1.0  | 1.0     | 2.0     | normal_metabolizer       |     | *35   | *35      | *35/*35   | 2.0                      | normal_metabolizer       |
| dijex3899 | *4  | *41  | 0.0  | 0.5     | 0.5     | intermediate_metabolizer |     | *4    | *41      | *4/*41    | 0.5                      | intermediate_metabolizer |
| dijex3900 | *1  | *127 | 1.0  | unknown | unknown | unknown                  | *1  | *127  | *1/*127  | unknown   | unknown                  |                          |
| dijex3901 | *3  | *4   | 0.0  | 0.0     | 0.0     | poor_metabolizer         |     | *3    | *4       | *3/*4     | 0.0                      | poor_metabolizer         |
| dijex3902 | *4  | *35  | 0.0  | 1.0     | 1.0     | intermediate_metabolizer |     | *4    | *35      | *4/*35    | 1.0                      | intermediate_metabolizer |
| dijex3903 | *1  | *41  | 1.0  | 0.5     | 1.5     | normal_metabolizer       |     | *1    | *41      | *1/*41    | 1.5                      | normal_metabolizer       |
| dijex3904 | *1  | *122 | 1.0  | unknown | unknown | unknown                  | *1  | *122  | *1/*122  | unknown   | unknown                  |                          |
| dijex3905 | *2  | *2   | 1.0  | 1.0     | 2.0     | normal_metabolizer       |     | *2    | *2       | *2/*2     | 2.0                      | normal_metabolizer       |
| dijex3906 | *1  | *1   | 1.0  | 1.0     | 2.0     | normal_metabolizer       |     | *1    | *1       | *1/*1     | 2.0                      | normal_metabolizer       |
| dijex3907 | *35 | *35  | 1.0  | 1.0     | 2.0     | normal_metabolizer       | DEL | *5    | *35      | *5/*35    | 1.0                      | intermediate_metabolizer |
| dijex3908 | *2  | *39  | 1.0  | 1.0     | 2.0     | normal_metabolizer       |     | *2    | *39      | *2/*39    | 2.0                      | normal_metabolizer       |
| dijex3909 | *1  | *4   | 1.0  | 0.0     | 1.0     | intermediate_metabolizer |     | *1    | *4       | *1/*4     | 1.0                      | intermediate_metabolizer |
| dijex3910 | *4  | *41  | 0.0  | 0.5     | 0.5     | intermediate_metabolizer |     | *4    | *41      | *4/*41    | 0.5                      | intermediate_metabolizer |
| dijex3911 | *1  | *2   | 1.0  | 1.0     | 2.0     | normal_metabolizer       |     | *1    | *2       | *1/*2     | 2.0                      | normal_metabolizer       |
| dijex3912 | *1  | *1   | 1.0  | 1.0     | 2.0     | normal_metabolizer       |     | *1    | *1       | *1/*1     | 2.0                      | normal_metabolizer       |
| dijex3913 | *10 | *41  | 0.25 | 0.5     | 0.75    | intermediate_metabolizer |     | *10   | *41      | *10/*41   | 0.75                     | intermediate_metabolizer |
| dijex3914 | *4  | *4   | 0.0  | 0.0     | 0.0     | poor_metabolizer         |     | *4    | *4       | *4/*4     | 0.0                      | poor_metabolizer         |
| dijex3915 | *1  | *2   | 1.0  | 1.0     | 2.0     | normal_metabolizer       | DUP | *1    | *2x2     | *1/*2x2   | 3.0                      | ultrarapid_metabolizer   |
| dijex3916 | *1  | *4   | 1.0  | 0.0     | 1.0     | intermediate_metabolizer |     | *1    | *4       | *1/*4     | 1.0                      | intermediate_metabolizer |
| dijex3917 | *4  | *4   | 0.0  | 0.0     | 0.0     | poor_metabolizer         |     | *4    | *4       | *4/*4     | 0.0                      | poor_metabolizer         |
| dijex3918 | *1  | *35  | 1.0  | 1.0     | 2.0     | normal_metabolizer       |     | *1    | *35      | *1/*35    | 2.0                      | normal_metabolizer       |
| dijex3919 | *33 | *117 | 1.0  | unknown | unknown | unknown                  | *33 | *117  | *33/*117 | unknown   | unknown                  |                          |
| dijex3920 | *2  | *9   | 1.0  | 0.5     | 1.5     | normal_metabolizer       |     | *2    | *9       | *2/*9     | 1.5                      | normal_metabolizer       |
| dijex3921 | *2  | *2   | 1.0  | 1.0     | 2.0     | normal_metabolizer       |     | *2    | *2       | *2/*2     | 2.0                      | normal_metabolizer       |
| dijex3922 | *4  | *9   | 0.0  | 0.5     | 0.5     | intermediate_metabolizer |     | *4    | *9       | *4/*9     | 0.5                      | intermediate_metabolizer |
| dijex3923 | *4  | *4   | 0.0  | 0.0     | 0.0     | poor_metabolizer         |     | *4    | *4       | *4/*4     | 0.0                      | poor_metabolizer         |
| dijex3924 | *35 | *127 | 1.0  | unknown | unknown | unknown                  | *35 | *127  | *35/*127 | unknown   | unknown                  |                          |
| dijex3925 | *1  | *6   | 1.0  | 0.0     | 1.0     | intermediate_metabolizer | DUP | *1    | *6x2     | *1/*6x2   | 1.0                      | intermediate_metabolizer |
| dijex3926 | *2  | *6   | 1.0  | 0.0     | 1.0     | intermediate_metabolizer |     | *2    | *6       | *2/*6     | 1.0                      | intermediate_metabolizer |
| dijex3927 | *2  | *10  | 1.0  | 0.25    | 1.25    | normal_metabolizer       |     | *2    | *10      | *2/*10    | 1.25                     | normal_metabolizer       |
| dijex3928 | *6  | *9   | 0.0  | 0.5     | 0.5     | intermediate_metabolizer |     | *6    | *9       | *6/*9     | 0.5                      | intermediate_metabolizer |
| dijex3929 | *2  | *35  | 1.0  | 1.0     | 2.0     | normal_metabolizer       |     | *2    | *35      | *2/*35    | 2.0                      | normal_metabolizer       |
| dijex3930 | *1  | *122 | 1.0  | unknown | unknown | unknown                  | *1  | *122  | *1/*122  | unknown   | unknown                  |                          |
| dijex3931 | *2  | *41  | 1.0  | 0.5     | 1.5     | normal_metabolizer       |     | *2    | *41      | *2/*41    | 1.5                      | normal_metabolizer       |
| dijex3932 | *1  | *1   | 1.0  | 1.0     | 2.0     | normal_metabolizer       |     | *1    | *1       | *1/*1     | 2.0                      | normal_metabolizer       |
| dijex3933 | *4  | *35  | 0.0  | 1.0     | 1.0     | intermediate_metabolizer |     | *4    | *35      | *4/*35    | 1.0                      | intermediate_metabolizer |
| dijex3934 | *4  | *41  | 0.0  | 0.5     | 0.5     | intermediate_metabolizer |     | *4    | *41      | *4/*41    | 0.5                      | intermediate_metabolizer |
| dijex3935 | *1  | *4   | 1.0  | 0.0     | 1.0     | intermediate_metabolizer |     | *1    | *4       | *1/*4     | 1.0                      | intermediate_metabolizer |
| dijex3936 | *2  | *10  | 1.0  | 0.25    | 1.25    | normal_metabolizer       |     | *2    | *10      | *2/*10    | 1.25                     | normal_metabolizer       |
| dijex3937 | *1  | *1   | 1.0  | 1.0     | 2.0     | normal_metabolizer       |     | *1    | *1       | *1/*1     | 2.0                      | normal_metabolizer       |
| dijex3938 | *1  | *122 | 1.0  | unknown | unknown | unknown                  | *1  | *122  | *1/*122  | unknown   | unknown                  |                          |
| dijex3939 | *2  | *4   | 1.0  | 0.0     | 1.0     | intermediate_metabolizer |     | *2    | *4       | *2/*4     | 1.0                      | intermediate_metabolizer |
| dijex3940 | *3  | *4   | 0.0  | 0.0     | 0.0     | poor_metabolizer         |     | *3    | *4       | *3/*4     | 0.0                      | poor_metabolizer         |
| dijex3941 | *1  | *1   | 1.0  | 1.0     | 2.0     | normal_metabolizer       |     | *1    | *1       | *1/*1     | 2.0                      | normal_metabolizer       |
| dijex3942 | *1  | *2   | 1.0  | 1.0     | 2.0     | normal_metabolizer       |     | *1    | *2       | *1/*2     | 2.0                      | normal_metabolizer       |
| dijex3943 | *2  | *3   | 1.0  | 0.0     | 1.0     | intermediate_metabolizer |     | *2    | *3       | *2/*3     | 1.0                      | intermediate_metabolizer |
| dijex3944 | *2  | *2   | 1.0  | 1.0     | 2.0     | normal_metabolizer       |     | *2    | *2       | *2/*2     | 2.0                      | normal_metabolizer       |
| dijex3945 | *1  | *41  | 1.0  | 0.5     | 1.5     | normal_metabolizer       |     | *1    | *41      | *1/*41    | 1.5                      | normal_metabolizer       |
| dijex3946 | *1  | *41  | 1.0  | 0.5     | 1.5     | normal_metabolizer       |     | *1    | *41      | *1/*41    | 1.5                      | normal_metabolizer       |
| dijex3947 | *1  | *2   | 1.0  | 1.0     | 2.0     | normal_metabolizer       |     | *1    | *2       | *1/*2     | 2.0                      | normal_metabolizer       |
| dijex3948 | *1  | *122 | 1.0  | unknown | unknown | unknown                  | *1  | *122  | *1/*122  | unknown   | unknown                  |                          |
| dijex3949 | *1  | *4   | 1.0  | 0.0     | 1.0     | intermediate_metabolizer |     | *1    | *4       | *1/*4     | 1.0                      | intermediate_metabolizer |
| dijex3950 | *10 | *10  | 0.25 | 0.25    | 0.5     | intermediate_metabolizer | DUP | *10x2 | *10      | *10x2/*10 | 0.75                     | intermediate_metabolizer |
| dijex3951 | *2  | *35  | 1.0  | 1.0     | 2.0     | normal_metabolizer       |     | *2    | *35      | *2/*35    | 2.0                      | normal_metabolizer       |
| dijex3952 | *2  | *4   | 1.0  | 0.0     | 1.0     | intermediate_metabolizer |     | *2    | *4       | *2/*4     | 1.0                      | intermediate_metabolizer |
| dijex3953 | *2  | *35  | 1.0  | 1.0     | 2.0     | normal_metabolizer       |     | *2    | *35      | *2/*35    | 2.0                      | normal_metabolizer       |
| dijex3954 | *2  | *2   | 1.0  | 1.0     | 2.0     | normal_metabolizer       |     | *2    | *2       | *2/*2     | 2.0                      | normal_metabolizer       |
| dijex3955 | *4  | *41  | 0.0  | 0.5     | 0.5     | intermediate_metabolizer |     | *4    | *41      | *4/*41    | 0.5                      | intermediate_metabolizer |
| dijex3956 | *33 | *33  | 1.0  | 1.0     | 2.0     | normal_metabolizer       |     | *33   | *33      | *33/*33   | 2.0                      | normal_metabolizer       |
| dijex3957 | *2  | *41  | 1.0  | 0.5     | 1.5     | normal_metabolizer       |     | *2    | *41      | *2/*41    | 1.5                      | normal_metabolizer       |
| dijex3958 | *1  | *122 | 1.0  | unknown | unknown | unknown                  | *1  | *122  | *1/*122  | unknown   | unknown                  |                          |
| dijex3959 | *1  | *122 | 1.0  | unknown | unknown | unknown                  | *1  | *122  | *1/*122  | unknown   | unknown                  |                          |
| dijex3960 | *1  | *127 | 1.0  | unknown | unknown | unknown                  | *1  | *127  | *1/*127  | unknown   | unknown                  |                          |
| dijex3961 | *1  | *4   | 1.0  | 0.0     | 1.0     | intermediate_metabolizer |     | *1    | *4       | *1/*4     | 1.0                      | intermediate_metabolizer |
| dijex3962 | *1  | *4   | 1.0  | 0.0     | 1.0     | intermediate_metabolizer |     | *1    | *4       | *1/*4     | 1.0                      | intermediate_metabolizer |
| dijex3963 | *2  | *35  | 1.0  |         |         |                          |     |       |          |           |                          |                          |

|           |     |      |      |         |         |                          |     |      |      |          |         |                          |
|-----------|-----|------|------|---------|---------|--------------------------|-----|------|------|----------|---------|--------------------------|
| dijex3983 | *3  | *3   | 0.0  | 0.0     | 0.0     | poor_metabolizer         | DEL | *3   | *5   | *3/*5    | 0.0     | poor_metabolizer         |
| dijex3984 | *1  | *2   | 1.0  | 1.0     | 2.0     | normal_metabolizer       |     | *1   | *2   | *1/*2    | 2.0     | normal_metabolizer       |
| dijex3985 | *4  | *33  | 0.0  | 1.0     | 1.0     | intermediate_metabolizer |     | *4   | *33  | *4/*33   | 1.0     | intermediate_metabolizer |
| dijex3986 | *2  | *41  | 1.0  | 0.5     | 1.5     | normal_metabolizer       |     | *2   | *41  | *2/*41   | 1.5     | normal_metabolizer       |
| dijex3987 | *1  | *41  | 1.0  | 0.5     | 1.5     | normal_metabolizer       |     | *1   | *41  | *1/*41   | 1.5     | normal_metabolizer       |
| dijex3988 | *41 | *41  | 0.5  | 0.5     | 1.0     | intermediate_metabolizer | DEL | *5   | *41  | *5/*41   | 0.5     | intermediate_metabolizer |
| dijex3989 | *1  | *4   | 1.0  | 0.0     | 1.0     | intermediate_metabolizer |     | *1   | *4   | *1/*4    | 1.0     | intermediate_metabolizer |
| dijex3990 | *1  | *1   | 1.0  | 1.0     | 2.0     | normal_metabolizer       |     | *1   | *1   | *1/*1    | 2.0     | normal_metabolizer       |
| dijex3991 | *1  | *2   | 1.0  | 1.0     | 2.0     | normal_metabolizer       | DUP | *1   | *2x2 | *1/*2x2  | 3.0     | ultrarapid_metabolizer   |
| dijex3992 | *10 | *35  | 0.25 | 1.0     | 1.25    | normal_metabolizer       |     | *10  | *35  | *10/*35  | 1.25    | normal_metabolizer       |
| dijex3993 | *1  | *2   | 1.0  | 1.0     | 2.0     | normal_metabolizer       |     | *1   | *2   | *1/*2    | 2.0     | normal_metabolizer       |
| dijex3994 | *2  | *33  | 1.0  | 1.0     | 2.0     | normal_metabolizer       |     | *2   | *33  | *2/*33   | 2.0     | normal_metabolizer       |
| dijex3995 | *1  | *41  | 1.0  | 0.5     | 1.5     | normal_metabolizer       |     | *1   | *41  | *1/*41   | 1.5     | normal_metabolizer       |
| dijex3996 | *1  | *4   | 1.0  | 0.0     | 1.0     | intermediate_metabolizer |     | *1   | *4   | *1/*4    | 1.0     | intermediate_metabolizer |
| dijex3997 | *4  | *4   | 0.0  | 0.0     | 0.0     | poor_metabolizer         | DUP | *4   | *4   | *4x2/*4  | 0.0     | poor_metabolizer         |
| dijex3998 | *1  | *2   | 1.0  | 1.0     | 2.0     | normal_metabolizer       |     | *1   | *2   | *1/*2    | 2.0     | normal_metabolizer       |
| dijex3999 | *2  | *41  | 1.0  | 0.5     | 1.5     | normal_metabolizer       |     | *2   | *41  | *2/*41   | 1.5     | normal_metabolizer       |
| dijex4000 | *1  | *1   | 1.0  | 1.0     | 2.0     | normal_metabolizer       |     | *1   | *1   | *1/*1    | 2.0     | normal_metabolizer       |
| dijex4001 | *1  | *2   | 1.0  | 1.0     | 2.0     | normal_metabolizer       |     | *1   | *2   | *1/*2    | 2.0     | normal_metabolizer       |
| dijex4002 | *1  | *2   | 1.0  | 1.0     | 2.0     | normal_metabolizer       |     | *1   | *2   | *1/*2    | 2.0     | normal_metabolizer       |
| dijex4003 | *1  | *2   | 1.0  | 1.0     | 2.0     | normal_metabolizer       | DUP | *1   | *2x2 | *1/*2x2  | 3.0     | ultrarapid_metabolizer   |
| dijex4004 | *1  | *4   | 1.0  | 0.0     | 1.0     | intermediate_metabolizer |     | *1   | *4   | *1/*4    | 1.0     | intermediate_metabolizer |
| dijex4005 | *1  | *4   | 1.0  | 0.0     | 1.0     | intermediate_metabolizer |     | *1   | *4   | *1/*4    | 1.0     | intermediate_metabolizer |
| dijex4006 | *1  | *127 | 1.0  | unknown | unknown | unknown                  |     | *1   | *127 | *1/*127  | unknown | unknown                  |
| dijex4007 | *1  | *1   | 1.0  | 1.0     | 2.0     | normal_metabolizer       |     | *1   | *1   | *1/*1    | 2.0     | normal_metabolizer       |
| dijex4008 | *4  | *86  | 0.0  | unknown | unknown | unknown                  |     | *4   | *86  | *4/*86   | unknown | unknown                  |
| dijex4009 | *1  | *4   | 1.0  | 0.0     | 1.0     | intermediate_metabolizer | DUP | *1x2 | *4   | *1x2/*4  | 2.0     | normal_metabolizer       |
| dijex4010 | *1  | *4   | 1.0  | 0.0     | 1.0     | intermediate_metabolizer |     | *1   | *4   | *1/*4    | 1.0     | intermediate_metabolizer |
| dijex4011 | *2  | *41  | 1.0  | 0.5     | 1.5     | normal_metabolizer       |     | *2   | *41  | *2/*41   | 1.5     | normal_metabolizer       |
| dijex4012 | *1  | *122 | 1.0  | unknown | unknown | unknown                  |     | *1   | *122 | *1/*122  | unknown | unknown                  |
| dijex4013 | *2  | *4   | 1.0  | 0.0     | 1.0     | intermediate_metabolizer |     | *2   | *4   | *2/*4    | 1.0     | intermediate_metabolizer |
| dijex4014 | *1  | *4   | 1.0  | 0.0     | 1.0     | intermediate_metabolizer |     | *1   | *4   | *1/*4    | 1.0     | intermediate_metabolizer |
| dijex4015 | *2  | *2   | 1.0  | 1.0     | 2.0     | normal_metabolizer       |     | *2   | *2   | *2/*2    | 2.0     | normal_metabolizer       |
| dijex4016 | *2  | *41  | 1.0  | 0.5     | 1.5     | normal_metabolizer       | DUP | *2x2 | *41  | *2x2/*41 | 2.5     | ultrarapid_metabolizer   |
| dijex4017 | *2  | *3   | 1.0  | 0.0     | 1.0     | intermediate_metabolizer |     | *2   | *3   | *2/*3    | 1.0     | intermediate_metabolizer |
| dijex4018 | *4  | *4   | 0.0  | 0.0     | 0.0     | poor_metabolizer         |     | *4   | *4   | *4/*4    | 0.0     | poor_metabolizer         |
| dijex4019 | *2  | *2   | 1.0  | 1.0     | 2.0     | normal_metabolizer       |     | *2   | *2   | *2/*2    | 2.0     | normal_metabolizer       |
| dijex4020 | *4  | *35  | 0.0  | 1.0     | 1.0     | intermediate_metabolizer |     | *4   | *35  | *4/*35   | 1.0     | intermediate_metabolizer |
| dijex4021 | *1  | *1   | 1.0  | 1.0     | 2.0     | normal_metabolizer       |     | *1   | *1   | *1/*1    | 2.0     | normal_metabolizer       |
| dijex4022 | *2  | *9   | 1.0  | 0.5     | 1.5     | normal_metabolizer       |     | *2   | *9   | *2/*9    | 1.5     | normal_metabolizer       |
| dijex4023 | *1  | *122 | 1.0  | unknown | unknown | unknown                  |     | *1   | *122 | *1/*122  | unknown | unknown                  |
| dijex4024 | *10 | *127 | 0.25 | unknown | unknown | unknown                  |     | *10  | *127 | *10/*127 | unknown | unknown                  |
| dijex4025 | *1  | *4   | 1.0  | 0.0     | 1.0     | intermediate_metabolizer |     | *1   | *4   | *1/*4    | 1.0     | intermediate_metabolizer |
| dijex4026 | *1  | *2   | 1.0  | 1.0     | 2.0     | normal_metabolizer       |     | *1   | *2   | *1/*2    | 2.0     | normal_metabolizer       |
| dijex4027 | *4  | *10  | 0.0  | 0.25    | 0.25    | intermediate_metabolizer |     | *4   | *10  | *4/*10   | 0.25    | intermediate_metabolizer |
| dijex4028 | *2  | *41  | 1.0  | 0.5     | 1.5     | normal_metabolizer       |     | *2   | *41  | *2/*41   | 1.5     | normal_metabolizer       |
| dijex4029 | *1  | *9   | 1.0  | 0.5     | 1.5     | normal_metabolizer       |     | *1   | *9   | *1/*9    | 1.5     | normal_metabolizer       |
| dijex4030 | *2  | *3   | 1.0  | 0.0     | 1.0     | intermediate_metabolizer |     | *2   | *3   | *2/*3    | 1.0     | intermediate_metabolizer |
| dijex4031 | *2  | *2   | 1.0  | 1.0     | 2.0     | normal_metabolizer       |     | *2   | *2   | *2/*2    | 2.0     | normal_metabolizer       |
| dijex4032 | *1  | *3   | 1.0  | 0.0     | 1.0     | intermediate_metabolizer |     | *1   | *3   | *1/*3    | 1.0     | intermediate_metabolizer |
| dijex4033 | *1  | *4   | 1.0  | 0.0     | 1.0     | intermediate_metabolizer | DUP | *1x2 | *4   | *1x2/*4  | 2.0     | normal_metabolizer       |
| dijex4034 | *4  | *35  | 0.0  | 1.0     | 1.0     | intermediate_metabolizer |     | *4   | *35  | *4/*35   | 1.0     | intermediate_metabolizer |
| dijex4035 | *1  | *122 | 1.0  | unknown | unknown | unknown                  | DEL | *1   | *122 | *1/*122  | unknown | unknown                  |
| dijex4036 | *1  | *2   | 1.0  | 1.0     | 2.0     | normal_metabolizer       |     | *1   | *2   | *1/*2    | 2.0     | normal_metabolizer       |
| dijex4037 | *1  | *35  | 1.0  | 1.0     | 2.0     | normal_metabolizer       |     | *1   | *35  | *1/*35   | 2.0     | normal_metabolizer       |
| dijex4038 | *1  | *1   | 1.0  | 1.0     | 2.0     | normal_metabolizer       |     | *1   | *1   | *1/*1    | 2.0     | normal_metabolizer       |
| dijex4039 | *1  | *20  | 1.0  | 0.0     | 1.0     | intermediate_metabolizer |     | *1   | *20  | *1/*20   | 1.0     | intermediate_metabolizer |
| dijex4040 | *2  | *4   | 1.0  | 0.0     | 1.0     | intermediate_metabolizer |     | *2   | *4   | *2/*4    | 1.0     | intermediate_metabolizer |
| dijex4041 | *1  | *35  | 1.0  | 1.0     | 2.0     | normal_metabolizer       |     | *1   | *35  | *1/*35   | 2.0     | normal_metabolizer       |
| dijex4042 | *1  | *33  | 1.0  | 1.0     | 2.0     | normal_metabolizer       |     | *1   | *33  | *1/*33   | 2.0     | normal_metabolizer       |
| dijex4043 | *1  | *4   | 1.0  | 0.0     | 1.0     | intermediate_metabolizer |     | *1   | *4   | *1/*4    | 1.0     | intermediate_metabolizer |
| dijex4044 | *4  | *127 | 0.0  | unknown | unknown | unknown                  |     | *4   | *127 | *4/*127  | unknown | unknown                  |
| dijex4045 | *1  | *9   | 1.0  | 0.5     | 1.5     | normal_metabolizer       |     | *1   | *9   | *1/*9    | 1.5     | normal_metabolizer       |
| dijex4046 | *2  | *2   | 1.0  | 1.0     | 2.0     | normal_metabolizer       | DUP | *1x2 | *1   | *1x2/*1  | 3.0     | ultrarapid_metabolizer   |
| dijex4047 | *2  | *2   | 1.0  | 1.0     | 2.0     | normal_metabolizer       |     | *2   | *2   | *2/*2    | 2.0     | normal_metabolizer       |
| dijex4048 | *1  | *4   | 1.0  | 0.0     | 1.0     | intermediate_metabolizer |     | *1   | *4   | *1/*4    | 1.0     | intermediate_metabolizer |
| dijex4049 | *2  | *41  | 1.0  | 0.5     | 1.5     | normal_metabolizer       |     | *2   | *41  | *2/*41   | 1.5     | normal_metabolizer       |
| dijex4050 | *2  | *4   | 1.0  | 0.0     | 1.0     | intermediate_metabolizer | DUP | *1x2 | *4   | *1x2/*4  | 2.0     | normal_metabolizer       |
| dijex4051 | *1  | *2   | 1.0  | 1.0     | 2.0     | normal_metabolizer       |     | *1   | *2   | *1/*2    | 2.0     | normal_metabolizer       |
| dijex4052 | *1  | *4   | 1.0  | 0.0     | 1.0     | intermediate_metabolizer |     | *1   | *4   | *1/*4    | 1.0     | intermediate_metabolizer |
| dijex4053 | *1  | *1   | 1.0  | 1.0     | 2.0     | normal_metabolizer       |     | *1   | *1   | *1/*1    | 2.0     | normal_metabolizer       |
| dijex4054 | *1  | *2   | 1.0  | 1.0     | 2.0     | normal_metabolizer       |     | *1   | *2   | *1/*2    | 2.0     | normal_metabolizer       |
| dijex4055 | *1  | *122 | 1.0  | unknown | unknown | unknown                  |     | *1   | *122 | *1/*122  | unknown | unknown                  |
| dijex4056 | *1  | *4   | 1.0  | 0.0     | 1.0     | intermediate_metabolizer |     | *1   | *4   | *1/*4    | 1.0     | intermediate_metabolizer |
| dijex4057 | *2  | *2   | 1.0  | 1.0     | 2.0     | normal_metabolizer       |     | *2   | *2   | *2/*2    | 2.0     | normal_metabolizer       |
| dijex4058 | *2  | *41  | 1.0  | 0.5     | 1.5     | normal_metabolizer       |     | *2   | *41  | *2/*41   | 1.5     | normal_metabolizer       |
| dijex4059 | *1  | *41  | 1.0  | 0.5     | 1.5     | normal_metabolizer       |     | *1   | *41  | *1/*41   | 1.5     | normal_metabolizer       |
| dijex4060 | *4  | *41  | 0.0  | 0.5     | 0.5     | intermediate_metabolizer |     | *4   | *41  | *4/*41   | 0.5     | intermediate_metabolizer |
| dijex4061 | *1  | *4   | 1.0  | 0.0     | 1.0     | intermediate_metabolizer |     | *1   | *4   | *1/*4    | 1.0     | intermediate_metabolizer |
| dijex4062 | *1  | *4   | 1.0  | 0.0     | 1.0     | intermediate_metabolizer |     | *1   | *4   | *1/*4    | 1.0     | intermediate_metabolizer |
| dijex4063 | *2  | *22  | 1.0  | unknown | unknown | unknown                  |     | *2   | *22  | *2/*22   | unknown | unknown                  |
| dijex4064 | *1  | *35  | 1.0  | 1.0     | 2.0     | normal_metabolizer       |     | *1   | *35  | *1/*35   | 2.0     | normal_metabolizer       |
| dijex4065 | *2  | *35  | 1.0  | 1.0     | 2.0     | normal_metabolizer       |     | *2   | *35  | *2/*35   | 2.0     | normal_metabolizer       |
| dijex4066 | *1  | *35  | 1.0  | 1.0     | 2.0     | normal_metabolizer       |     | *1   | *35  | *1/*35   | 2.0     | normal_metabolizer       |
| dijex4067 | *35 | *35  | 1.0  | 1.0     | 2.0     | normal_metabolizer       |     | *35  | *35  | *35/*35  | 2.0     | normal_metabolizer       |
| dijex4068 | *4  | *4   | 0.0  | 0.0     | 0.0     | poor_metabolizer         |     | *4   | *4   | *4/*4    | 0.0     | poor_metabolizer         |
| dijex4069 | *1  | *2   | 1.0  | 1.0     | 2.0     | normal_metabolizer       |     | *1   | *2   | *1/*2    | 2.0     | normal_metabolizer       |
| dijex4070 | *1  | *2   | 1.0  | 1.0     | 2.0     | normal_metabolizer       | DUP | *1   | *2x2 | *1/*2x2  | 3.0     | ultrarapid_metabolizer   |
| dijex4071 | *4  | *10  | 0.0  | 0.25    | 0.25    | intermediate_metabolizer |     | *4   | *10  | *4/*10   | 0.25    | intermediate_metabolizer |
| dijex5386 | *2  | *2   | 1.0  | 1.0     | 2.0     | normal_metabolizer       |     | *2   | *2   | *2/*2    | 2.0     | normal_metabolizer       |
| dijex5387 | *1  | *2   | 1.0  | 1.0     | 2.0     | normal_metabolizer       |     | *1   | *2   | *1/*2    | 2.0     | normal_metabolizer       |
| dijex5388 | *1  | *2   | 1.0  | 1.0     | 2.0     | normal_metabolizer       |     | *1   | *2   | *1/*2    | 2.0     | normal_metabolizer       |
| dijex5389 | *1  | *39  | 1.0  | 1.0     | 2.0     | normal_metabolizer       |     | *1   | *39  | *1/*39   | 2.0     | normal_metabolizer       |
| dijex5390 | *4  | *41  | 0.0  | 0.5     | 0.5     | intermediate_metabolizer |     | *4   | *41  | *4/*41   | 0.5     | intermediate_metabolizer |
| dijex5391 | *1  | *127 | 1.0  | unknown | unknown | unknown                  |     | *1   | *127 | *1/*127  | unknown | unknown                  |
| dijex5392 | *1  | *122 | 1.0  | unknown | unknown | unknown                  |     | *1   | *122 | *1/*122  | unknown | unknown                  |
| dijex5393 | *1  | *1   | 1.0  | 1.0     | 2.0     | normal_metabolizer       |     | *1   | *1   | *1/*1    | 2.0     | normal_metabolizer       |
| dijex5394 | *4  | *41  | 0.0  | 0.5     | 0.5     | intermediate_metabolizer |     | *4   | *41  | *4/*41   | 0.5     | intermediate_metabolizer |
| dijex5395 | *1  | *122 | 1.0  | unknown | unknown | unknown                  |     | *1   | *122 | *1/*122  | unknown | unknown                  |
| dijex5396 | *1  | *41  | 1.0  | 0.5     | 1.5     | normal_metabolizer       |     | *1   | *41  | *1/*41   | 1.5     | normal_metabolizer       |
| dijex5398 | *1  | *2   | 1.0  | 1.0     | 2.0     | normal_metabolizer       |     | *1   | *2   | *1/*2    | 2.0     | normal_metabolizer       |
