# Supplementary material
Source: publisher figshare collection journal article supplement (https://future-science-group.figshare.com/articles/dataset/_/20746831)
Supplement: Supplementary file 2 [file 1]

| patient   | Number of clearance | Mean of individual clearance | minimum       | Q1            | median        | Q3            | maximum       |
|-----------|---------------------|------------------------------|---------------|---------------|---------------|---------------|---------------|
| dijex3666 | 4                   | 166.701023177                | 107.792886747 | 107.792886747 | 175.011485129 | 208.988235704 | 208.988235704 |
| dijex3787 | 2                   | 274.071106325                | 245.553185285 | 245.553185285 | 274.071106325 | 302.589027365 | 302.589027365 |
| dijex3783 | 4                   | 268.202005555                | 237.254469212 | 237.254469212 | 268.721557279 | 298.110438452 | 298.110438452 |
| dijex3942 | 5                   | 229.706376645                | 140.504254157 | 143.071109744 | 159.846547315 | 351.271558211 | 479.195885928 |
| dijex3775 | 4                   | 221.821692798                | 189.15340341  | 189.15340341  | 208.410915441 | 281.311536899 | 281.311536899 |
| dijex3777 | 2                   | 127.826864248                | 123.355263158 | 123.355263158 | 127.826864248 | 132.298465338 | 132.298465338 |
| dijex4049 | 4                   | 267.653047481                | 240.326844509 | 240.326844509 | 262.095113179 | 306.095119058 | 306.095119058 |
| dijex4046 | 3                   | 239.280264232                | 197.180321404 | 197.180321404 | 248.921340856 | 271.739130435 | 271.739130435 |
| dijex4045 | 6                   | 215.599483005                | 154.703967512 | 179.895051845 | 225.395316559 | 241.50808061  | 243.389755504 |
| dijex3838 | 2                   | 141.97384414                 | 110.406170305 | 110.406170305 | 141.97384414  | 173.541517975 | 173.541517975 |
| dijex3797 | 1                   | 106.643059945                | 106.643059945 | 106.643059945 | 106.643059945 | 106.643059945 | 106.643059945 |
| dijex3799 | 3                   | 313.362629095                | 232.919254658 | 232.919254658 | 262.378240098 | 444.790392528 | 444.790392528 |
| dijex3885 | 2                   | 134.894362383                | 125.236648472 | 125.236648472 | 134.894362383 | 144.552076293 | 144.552076293 |
| dijex3951 | 3                   | 191.888583925                | 170.502983802 | 170.502983802 | 185.452297548 | 219.710470425 | 219.710470425 |
| dijex3888 | 7                   | 162.823995552                | 109.679959503 | 120.566849681 | 161.41102584  | 185.977310768 | 237.349040906 |
| dijex3889 | 7                   | 381.536166998                | 293.162547357 | 308.954050107 | 345.522602937 | 484.003281378 | 496.446488294 |
| dijex3705 | 7                   | 217.861741225                | 155.575838035 | 164.137729793 | 223.5003129   | 260.845851958 | 290.124956144 |
| dijex3800 | 4                   | 301.340128829                | 254.525994283 | 254.525994283 | 288.948664937 | 372.937191161 | 372.937191161 |
| dijex3706 | 1                   | 235.282584187                | 235.282584187 | 235.282584187 | 235.282584187 | 235.282584187 | 235.282584187 |
| dijex4050 | 2                   | 258.9461825                  | 229.638701776 | 229.638701776 | 258.9461825   | 288.253663224 | 288.253663224 |
| dijex3953 | 1                   | 142.396050883                | 142.396050883 | 142.396050883 | 142.396050883 | 142.396050883 | 142.396050883 |
| dijex4054 | 3                   | 165.028272118                | 146.290564787 | 146.290564787 | 155.815874446 | 192.978377122 | 192.978377122 |
| dijex3928 | 1                   | 282.862954488                | 282.862954488 | 282.862954488 | 282.862954488 | 282.862954488 | 282.862954488 |
| dijex3924 | 3                   | 481.861238611                | 424.408186362 | 424.408186362 | 465.838509317 | 555.337020154 | 555.337020154 |
| dijex3927 | 1                   | 233.558433549                | 223.558433549 | 223.558433549 | 223.558433549 | 223.558433549 | 223.558433549 |
| dijex3926 | 2                   | 333.427036482                | 304.535232384 | 304.535232384 | 333.427036482 | 362.31884058  | 362.31884058  |
| dijex3920 | 2                   | 253.123667945                | 251.491901108 | 251.491901108 | 253.123667945 | 254.755434783 | 254.755434783 |
| dijex3719 | 2                   | 334.031932112                | 295.876417092 | 295.876417092 | 334.031932112 | 372.187447132 | 372.187447132 |
| dijex3716 | 1                   | 244.963995989                | 244.963995989 | 244.963995989 | 244.963995989 | 244.963995989 | 244.963995989 |
| dijex3717 | 4                   | 249.515667452                | 191.869601764 | 191.869601764 | 251.300865921 | 303.5913362   | 303.5913362   |
| dijex4025 | 5                   | 202.143237453                | 153.570003989 | 169.573973362 | 189.44775978  | 241.060240379 | 261.287625418 |
| dijex4024 | 3                   | 163.179422039                | 132.988155188 | 132.988155188 | 150.687133328 | 205.862977602 | 205.862977602 |
| dijex4021 | 8                   | 179.74824992                 | 130.27194268  | 140.591228462 | 178.406130275 | 216.805343959 | 248.897290485 |
| dijex4022 | 5                   | 225.818219739                | 170.076126074 | 171.72187167  | 141.922217169 | 271.862569094 | 292.454669526 |
| dijex3649 | 4                   | 176.399674864                | 148.834440289 | 148.834440289 | 177.367777127 | 202.028704912 | 202.028704912 |
| dijex3721 | 3                   | 213.927378138                | 122.14021171  | 122.14021171  | 212.912087912 | 306.729834791 | 306.729834791 |
| dijex3720 | 7                   | 151.967528322                | 86.6282462795 | 137.75038782  | 156.492032168 | 176.920695298 | 192.754827906 |
| dijex3824 | 1                   | 194.508009153                | 194.508009153 | 194.508009153 | 194.508009153 | 194.508009153 | 194.508009153 |
| dijex3826 | 4                   | 218.946878855                | 171.230433356 | 171.230433356 | 212.77609974  | 279.004882585 | 279.004882585 |
| dijex3729 | 2                   | 275.313943264                | 268.301517245 | 268.301517245 | 275.313943264 | 282.326369283 | 282.326369283 |
| dijex3647 | 3                   | 255.690045186                | 243.787618952 | 243.787618952 | 255.754475703 | 267.528040902 | 267.528040902 |
| dijex3907 | 2                   | 231.075111989                | 200.383171723 | 200.383171723 | 231.075111989 | 261.767052254 | 261.767052254 |
| dijex3906 | 6                   | 295.589325027                | 180.148383444 | 203.952467465 | 301.731263614 | 381.084244003 | 443.560436277 |
| dijex3908 | 5                   | 259.73265016                 | 197.40690193  | 205.930242975 | 247.189489367 | 319.806637741 | 357.422640031 |
| dijex3854 | 2                   | 229.235958393                | 218.330359658 | 218.330359658 | 229.235958393 | 240.141557128 | 240.141557128 |
| dijex3730 | 4                   | 128.465654911                | 102.448775612 | 102.448775612 | 132.780126628 | 145.853590776 | 145.853590776 |
| dijex3850 | 5                   | 213.401683534                | 170.899006455 | 181.87306564  | 219.034059796 | 242.114113298 | 262.022464059 |
| dijex3853 | 1                   | 421.33767611                 | 421.33767611  | 421.33767611  | 421.33767611  | 421.33767611  | 421.33767611  |
| dijex3983 | 4                   | 177.45995614                 | 136.16374615  | 136.16374615  | 176.816830298 | 220.042417815 | 220.042417815 |
| dijex3982 | 3                   | 252.954892475                | 209.454096481 | 209.454096481 | 258.124630126 | 291.285950819 | 291.285950819 |
| dijex3738 | 1                   | 208.578848019                | 208.578848019 | 208.578848019 | 208.578848019 | 208.578848019 | 208.578848019 |
| dijex3985 | 1                   | 250.836120401                | 250.836120401 | 250.836120401 | 250.836120401 | 250.836120401 | 250.836120401 |
| dijex3693 | 1                   | 169.453734671                | 169.453734671 | 169.453734671 | 169.453734671 | 169.453734671 | 169.453734671 |
| dijex3697 | 5                   | 366.795934559                | 189.953566906 | 237.997378419 | 323.927440253 | 517.028737853 | 678.326250409 |
| dijex3910 | 6                   | 231.045990716                | 176.563920977 | 186.649066528 | 225.625590663 | 280.863314957 | 324.464633355 |
| dijex3919 | 3                   | 236.510527422                | 141.989815903 | 141.989815903 | 198.187608491 | 369.354157873 | 369.354157873 |
| dijex3840 | 4                   | 227.660541965                | 141.834750696 | 141.834750696 | 234.478671101 | 299.850074963 | 299.850074963 |
| dijex3841 | 1                   | 537.340619308                | 537.340619308 | 537.340619308 | 537.340619308 | 537.340619308 | 537.340619308 |
| dijex3848 | 4                   | 340.575792874                | 308.083336543 | 308.083336543 | 333.8732025   | 386.473429952 | 386.473429952 |
| dijex3849 | 3                   | 158.999196665                | 135.243438189 | 135.243438189 | 166.269604924 | 175.484546883 | 175.484546883 |
| dijex3767 | 6                   | 170.815337151                | 91.3408841798 | 128.730327242 | 179.428597803 | 204.287086408 | 214.217708664 |
| dijex3688 | 8                   | 312.33064042                 | 229.33588151  | 245.524296675 | 288.332873134 | 372.670807453 | 481.56301596  |
| dijex3687 | 6                   | 243.827022429                | 198.235923022 | 206.605884216 | 235.08231823  | 289.79286484  | 303.708439898 |
| dijex5387 | 6                   | 252.117807897                | 174.547762615 | 197.345427813 | 268.820709611 | 290.187286266 | 292.377545405 |
| dijex5386 | 4                   | 212.407640253                | 153.977065521 | 153.977065521 | 219.013496649 | 257.62650219  | 257.62650219  |
| dijex5389 | 3                   | 250.939641202                | 220.926122305 | 220.926122305 | 224.526249613 | 307.366551689 | 307.366551689 |
| dijex5388 | 2                   | 151.426211036                | 125.167724751 | 125.167724751 | 151.426211036 | 177.68469732  | 177.68469732  |
| dijex3963 | 5                   | 359.259246801                | 222.52653201  | 258.647201156 | 378.071833648 | 450.464999022 | 459.526334394 |
| dijex3962 | 3                   | 202.759292157                | 166.10327544  | 166.10327544  | 218.927638654 | 223.246962377 | 223.246962377 |
| dijex3967 | 5                   | 263.79657203                 | 213.327915482 | 233.475551944 | 263.124921689 | 294.453417287 | 304.469613933 |
| dijex4002 | 4                   | 198.58446709                 | 174.279948633 | 174.279948633 | 198.39558736  | 223.266745006 | 223.266745006 |
| dijex4006 | 2                   | 375.481865749                | 283.24599915  | 283.24599915  | 375.481865749 | 467.717732349 | 467.717732349 |
| dijex4004 | 2                   | 255.458975147                | 238.367658276 | 238.367658276 | 255.458975147 | 272.550292018 | 272.550292018 |
| dijex3670 | 7                   | 210.406490286                | 130.465123335 | 165.41025262  | 213.087767091 | 248.810915277 | 294.049263509 |
| dijex5398 | 1                   | 180.54886856                 | 180.54886856  | 180.54886856  | 180.54886856  | 180.54886856  | 180.54886856  |
| dijex5390 | 3                   | 312.305169769                | 278.038438814 | 278.038438814 | 321.83628856  | 337.040781935 | 337.040781935 |
| dijex5393 | 2                   | 184.527200047                | 172.929636389 | 172.929636389 | 184.527200047 | 196.124763705 | 196.124763705 |
| dijex5394 | 2                   | 139.011116142                | 129.89900665  | 129.89900665  | 139.011116142 | 148.12233162  | 148.12233162  |
| dijex5395 | 5                   | 349.091772928                | 289.855072464 | 300.207039337 | 340.560790101 | 402.241997931 | 406.022669599 |
| dijex5396 | 1                   | 398.883127244                | 398.883127244 | 398.883127244 | 398.883127244 | 398.883127244 | 398.883127244 |
| dijex5397 | 4                   | 188.761367312                | 151.981531358 | 151.981531358 | 178.156156851 | 246.751624188 | 246.751624188 |
| dijex3864 | 2                   | 245.524626257                | 203.362255965 | 203.362255965 | 245.524626257 | 287.686996548 | 287.686996548 |
| dijex3866 | 5                   | 308.357875303                | 195.644649119 | 233.798120868 | 298.890848613 | 387.651143084 | 406.451716755 |
| dijex3861 | 4                   | 140.440451918                | 124.012253281 | 124.012253281 | 136.791415062 | 164.166724269 | 164.166724269 |
| dijex4015 | 6                   | 350.87492807                 | 293.19221968  | 295.392348271 | 333.357008545 | 423.875427395 | 425.818018826 |
| dijex4016 | 4                   | 227.572463768                | 153.043478261 | 153.043478261 | 226.449275362 | 304.347826087 | 304.347826087 |
| dijex4010 | 2                   | 199.45103629                 | 183.236096045 | 183.236096045 | 199.45103629  | 215.665976536 | 215.665976536 |
| dijex4012 | 3                   | 201.700526922                | 168.366841636 | 168.366841636 | 207.191125845 | 229.543613287 | 229.543613287 |
