# Supplementary material
Source: publisher figshare collection journal article supplement (https://future-science-group.figshare.com/articles/dataset/_/20746831)
Supplement: Supplementary file 3 [file 1]

Table 1

| drug                                                       | gene    | variants    | Number of patient<br>with this variant | Frequency of patient with<br>this variant in our cohort |
|------------------------------------------------------------|---------|-------------|----------------------------------------|---------------------------------------------------------|
| Azathioprine / mercaptopurine                              | NUDT15  | rs116855232 | 2                                      | 0,45 %                                                  |
| Azathioprine / mercaptopurine                              | NUDT15  | rs746071566 | 0                                      | 0,00 %                                                  |
| Azathioprine / mercaptopurine                              | TMPT    | rs1142345   | 34                                     | 7,64 %                                                  |
| Azathioprine / mercaptopurine                              | TMPT    | rs1800460   | 32                                     | 7,19 %                                                  |
| Azathioprine / mercaptopurine                              | TMPT    | rs1800462   | 5                                      | 1,12 %                                                  |
| Azathioprine / mercaptopurine                              | TMPT    | rs1800584   | 0                                      | 0,00 %                                                  |
| Desflurane                                                 | CACNA1S | rs1800559   | 0                                      | 0,00 %                                                  |
| Desflurane                                                 | CACNA1S | rs772226819 | 0                                      | 0,00 %                                                  |
| Desflurane                                                 | RYR1    | rs144336148 | 1                                      | 0,22 %                                                  |
| Desflurane                                                 | RYR1    | rs111888148 | 0                                      | 0,00 %                                                  |
| Desflurane                                                 | RYR1    | rs112563513 | 0                                      | 0,00 %                                                  |
| Desflurane                                                 | RYR1    | rs118192116 | 0                                      | 0,00 %                                                  |
| Desflurane                                                 | RYR1    | rs118192122 | 0                                      | 0,00 %                                                  |
| Desflurane                                                 | RYR1    | rs118192124 | 0                                      | 0,00 %                                                  |
| Desflurane                                                 | RYR1    | rs118192161 | 0                                      | 0,00 %                                                  |
| Desflurane                                                 | RYR1    | rs118192162 | 0                                      | 0,00 %                                                  |
| Desflurane                                                 | RYR1    | rs118192163 | 0                                      | 0,00 %                                                  |
| Desflurane                                                 | RYR1    | rs118192167 | 0                                      | 0,00 %                                                  |
| Desflurane                                                 | RYR1    | rs118192168 | 0                                      | 0,00 %                                                  |
| Desflurane                                                 | RYR1    | rs118192170 | 0                                      | 0,00 %                                                  |
| Desflurane                                                 | RYR1    | rs118192172 | 0                                      | 0,00 %                                                  |
| Desflurane                                                 | RYR1    | rs118192175 | 0                                      | 0,00 %                                                  |
| Desflurane                                                 | RYR1    | rs118192176 | 0                                      | 0,00 %                                                  |
| Desflurane                                                 | RYR1    | rs118192177 | 0                                      | 0,00 %                                                  |
| Desflurane                                                 | RYR1    | rs118192178 | 0                                      | 0,00 %                                                  |
| Desflurane                                                 | RYR1    | rs121918592 | 0                                      | 0,00 %                                                  |
| Desflurane                                                 | RYR1    | rs121918593 | 0                                      | 0,00 %                                                  |
| Desflurane                                                 | RYR1    | rs121918594 | 0                                      | 0,00 %                                                  |
| Desflurane                                                 | RYR1    | rs121918595 | 0                                      | 0,00 %                                                  |
| Desflurane                                                 | RYR1    | rs121918596 | 0                                      | 0,00 %                                                  |
| Desflurane                                                 | RYR1    | rs1801086   | 0                                      | 0,00 %                                                  |
| Desflurane                                                 | RYR1    | rs193922747 | 0                                      | 0,00 %                                                  |
| Desflurane                                                 | RYR1    | rs193922748 | 0                                      | 0,00 %                                                  |
| Desflurane                                                 | RYR1    | rs193922753 | 0                                      | 0,00 %                                                  |
| Desflurane                                                 | RYR1    | rs193922762 | 0                                      | 0,00 %                                                  |
| Desflurane                                                 | RYR1    | rs193922764 | 0                                      | 0,00 %                                                  |
| Desflurane                                                 | RYR1    | rs193922768 | 0                                      | 0,00 %                                                  |
| Desflurane                                                 | RYR1    | rs193922770 | 0                                      | 0,00 %                                                  |
| Desflurane                                                 | RYR1    | rs193922772 | 0                                      | 0,00 %                                                  |
| Desflurane                                                 | RYR1    | rs193922802 | 0                                      | 0,00 %                                                  |
| Desflurane                                                 | RYR1    | rs193922803 | 0                                      | 0,00 %                                                  |
| Desflurane                                                 | RYR1    | rs193922807 | 0                                      | 0,00 %                                                  |
| Desflurane                                                 | RYR1    | rs193922809 | 0                                      | 0,00 %                                                  |
| Desflurane                                                 | RYR1    | rs193922816 | 0                                      | 0,00 %                                                  |
| Desflurane                                                 | RYR1    | rs193922818 | 0                                      | 0,00 %                                                  |
| Desflurane                                                 | RYR1    | rs193922832 | 0                                      | 0,00 %                                                  |
| Desflurane                                                 | RYR1    | rs193922843 | 0                                      | 0,00 %                                                  |
| Desflurane                                                 | RYR1    | rs193922876 | 0                                      | 0,00 %                                                  |
| Desflurane                                                 | RYR1    | rs193922878 | 0                                      | 0,00 %                                                  |
| Desflurane                                                 | RYR1    | rs28933396  | 0                                      | 0,00 %                                                  |
| Desflurane                                                 | RYR1    | rs28933397  | 0                                      | 0,00 %                                                  |
| Desflurane                                                 | RYR1    | rs63749869  | 0                                      | 0,00 %                                                  |
| Erlotinib                                                  | EGFR    | rs121434568 | 0                                      | 0,00 %                                                  |
| 5 FU / capecitabine                                        | DPYD    | rs67376798  | 5                                      | 1,12 %                                                  |
| 5 FU / capecitabine                                        | DPYD    | rs3918290   | 2                                      | 0,45 %                                                  |
| 5 FU / capecitabine                                        | DPYD    | rs55886062  | 0                                      | 0,00 %                                                  |
| rasburicase                                                | G6PD    | rs1050829   | 1                                      | 0,22 %                                                  |
| rasburicase                                                | G6PD    | rs1050828   | 0                                      | 0,00 %                                                  |
| rasburicase                                                | G6PD    | rs5030868   | 0                                      | 0,00 %                                                  |
| Tamoxifen / codeine / Tramadol / ondansetron / tropisetron | CYP2D6  | rs3892097   | 134                                    | 30,11 %                                                 |
| Tamoxifen / codeine / Tramadol / ondansetron / tropisetron | CYP2D6  | DUP         | 15                                     | 3,37 %                                                  |
| Tamoxifen / codeine / Tramadol / ondansetron / tropisetron | CYP2D6  | DEL         | 5                                      | 1,12 %                                                  |
| Tamoxifen / codeine / Tramadol / ondansetron / tropisetron | CYP2D6  | rs1065852   | 0                                      | 0,00 %                                                  |
| Tamoxifen / codeine / Tramadol / ondansetron / tropisetron | CYP2D6  | rs28371725  | 0                                      | 0,00 %                                                  |
| Tamoxifen / codeine / Tramadol / ondansetron / tropisetron | CYP2D6  | rs35742686  | 0                                      | 0,00 %                                                  |
| Tamoxifen / codeine / Tramadol / ondansetron / tropisetron | CYP2D6  | rs5030655   | 0                                      | 0,00 %                                                  |
