# Supplementary material
Source: publisher figshare collection journal article supplement (https://future-science-group.figshare.com/articles/dataset/_/20746831)
Supplement: Supplementary file 4 [file 1]

| ID        | Patient<br>year of<br>birth | CYP2D6<br>status | Drug<br>received        | sentence in medical record (translate)                                                                                                                                                                  | original sentence in medical record<br>(French)                                                                                                                                                                                                                               |
|-----------|-----------------------------|------------------|-------------------------|---------------------------------------------------------------------------------------------------------------------------------------------------------------------------------------------------------|-------------------------------------------------------------------------------------------------------------------------------------------------------------------------------------------------------------------------------------------------------------------------------|
| dijex3686 | 1922                        | UM               | codeine                 | codeine intolerance                                                                                                                                                                                     | intolérance à la codéine                                                                                                                                                                                                                                                      |
| dijex3915 | 1957                        | UM               | codeine and<br>tramadol | Painkiller for the knee causing by a fall in<br>sledge, administration of acetaminophen<br>and morphine (codeine and Tramadol<br>intolerance)                                                           | Antalgique pour le genou pour chute<br>de luge, par paracétamol et morphine<br>(intolérance codéine et Tramadol)                                                                                                                                                              |
| dijex3777 | 1952                        | PM               | tramadol                | tramadol ineffective                                                                                                                                                                                    | Tamadol inefficace                                                                                                                                                                                                                                                            |
| dijex3997 | 1978                        | PM               | oxycodone               | Completion of numerous boluses of<br>oxycodone but resistance to pain                                                                                                                                   | Réalisation de nombreux bolus<br>d'oxycodone mais résistance des<br>douleurs                                                                                                                                                                                                  |
| dijex4068 | 1984                        | PM               | oxycodone               | we switched his interdoses of morphine to<br>a PCA of Oxycodone on February 8, 2020<br>which was gradually increased with the<br>introduction of Ketamine                                               | nous avons switché ses interdoses de<br>morphine par une PCA d'Oxycodone le<br>8 février 2020 qui a été augmentée<br>progressivement avec mise en place<br>de Kétamine                                                                                                        |
| dijex3683 | 1958                        | NM               | oxycodone               | Pain in the humerus well controlled by<br>level 3 analgesics (Oxycodone) then<br>(31/03/2017) TCA of morphine, the doses<br>will be gradually increased during<br>hospitalization until today at 4 mg/h | Douleur de l'humérus bien contrôlée<br>par des antalgiques de palier 3<br>(Oxycodone) puis (31/03/2017) TCA<br>de morphine, les doses seront<br>progressivement augmentées durant<br>l'hospitalisation jusqu'à ce jour à 4<br>mg/h de débit associées à des bolus de<br>4 mg. |
| dijex3687 | 1953                        | NM               | oxycodone               | associated flow rate at boluses of 4 mg.                                                                                                                                                                | Oxycodone à la demande                                                                                                                                                                                                                                                        |
| dijex3700 | 1987                        | NM               | tramadol                | Oxycodone on demand                                                                                                                                                                                     | PCA de tramadol bien supporté                                                                                                                                                                                                                                                 |
| dijex3734 | 1973                        | NM               | tramadol                | tramadol pump (PCA) well supported                                                                                                                                                                      | oxycodone en fin de vie                                                                                                                                                                                                                                                       |
| dijex3759 | 1944                        | NM               | oxycodone               | oxycodone at the end of life                                                                                                                                                                            | oxycodone LP 5 & Fentanyl 37mg                                                                                                                                                                                                                                                |
| dijex3813 | 1963                        | NM               | oxycodone               | oxycodone LP 5 & Fentanyl 37mg patch                                                                                                                                                                    |                                                                                                                                                                                                                                                                               |
| dijex3813 | 1963                        | NM               | oxycodone               | The analgesic treatment today combines<br>OXYCONTIN 140 mg morning and evening,<br>OXYNORM 20 in interdose, he takes it<br>twice a day.                                                                 | Le traitement antalgique associe<br>aujourd'hui OXYCONTIN 140 mg matin<br>et soir, OXYNORM 20 en interdose, il<br>en prend 2 fois/jour.                                                                                                                                       |
| dijex3830 | 1956                        | NM               | oxycodone               | Patient taking Oxycodone.                                                                                                                                                                               | Patiente qui prend de l'Oxycodone.                                                                                                                                                                                                                                            |
| dijex3850 | 1964                        | NM               | oxycodone               | Oxycodone LP 5 mg morning and evening<br>with interdoses of Oxycodone 5 mg on<br>demand                                                                                                                 | Oxycodone LP 5 mg matin et soir avec<br>interdoses d'Oxycodone 5 mg à la<br>demande                                                                                                                                                                                           |
| dijex3873 | 1950                        | NM               | oxycodone               | We renew the analgesic treatment based<br>on FENTANYL 12 mg, OXYCODONE 5 mg                                                                                                                             | On renouvelle le traitement antalgique<br>à base de FENTANYL 12 mg,<br>OXYCODONE 5 mg                                                                                                                                                                                         |
| dijex3884 | 1955                        | NM               | tramadol                | Tramadol on demand, marked<br>improvement in pain                                                                                                                                                       | Sous Tramadol à la demande, nette<br>amélioration des douleurs                                                                                                                                                                                                                |
| dijex3937 | 1956                        | NM               | tramadol                | It should be remembered that taking<br>TRAMADOL is poorly tolerated.                                                                                                                                    | Rappelons que la prise de TRAMADOL<br>est mal tolérée.                                                                                                                                                                                                                        |
| dijex3942 | 1954                        | NM               | oxycodone               | Marked improvement in abdominal pain<br>with Oxycodone LP 10 mg morning and<br>evening and Oxycodone 5 mg on demand                                                                                     | Nette amélioration des douleurs<br>abdominales sous Oxycodone LP 10<br>mg matin et soir et Oxycodone 5 mg à<br>la demande                                                                                                                                                     |
| dijex4054 | 1949                        | NM               | oxycodone               | PCA oxycodone well tolerated                                                                                                                                                                            | PCA oxycodone bien toléré                                                                                                                                                                                                                                                     |

|           |      |    |           |                                                                                  |                                                                                        |
|-----------|------|----|-----------|----------------------------------------------------------------------------------|----------------------------------------------------------------------------------------|
| dijex4057 | 1977 | NM | oxycodone | The pain is well controlled with Oxycodone 10 mg, she did not take an interdose. | Les douleurs sont bien contrôlées sous Oxycodone 10 mg, elle n'a pas pris d'interdose. |
| dijex4069 | 1947 | NM | oxycodone | oxycodone well tolerated                                                         | oxycodone bien supporté                                                                |
