# Supplementary material
Source: publisher figshare collection journal article supplement (https://future-science-group.figshare.com/articles/dataset/_/20746831)
Supplement: Supplementary file 5 [file 1]

| ID        | Patient year<br>of birth | CYP2D6<br>status | Drug received           | nausea | Grade (CTCAE v5.0) | vomiting | Grade (CTCAE v5.0) |
|-----------|--------------------------|------------------|-------------------------|--------|--------------------|----------|--------------------|
| dijex3686 | 1922                     | UM               | ondansetron             | yes    | 1                  | no       | 0                  |
| dijex3915 | 1957                     | UM               | ondansetron             | no     | 0                  | no       | 0                  |
| dijex4016 | 1971                     | UM               | ondansetron             | yes    | 2                  | yes      | 3                  |
| dijex4046 | 1948                     | UM               | ondansetron             | yes    | 3                  | yes      | 3                  |
| dijex4070 | 1949                     | UM               | ondansetron             | no     | 0                  | no       | 0                  |
| dijex3654 | 1936                     | NM               | ondansetron             | no     | 0                  | no       | 0                  |
| dijex3657 | 1977                     | NM               | ondansetron             | yes    | 3                  | yes      | 4                  |
| dijex3660 | 1950                     | NM               | ondansetron             | no     | 0                  | no       | 0                  |
| dijex3673 | 1940                     | NM               | ondansetron             | yes    | 1                  | no       | 0                  |
| dijex3676 | 1949                     | NM               | ondansetron             | no     | 0                  | no       | 0                  |
| dijex3683 | 1958                     | NM               | ondansetron             | no     | 0                  | no       | 0                  |
| dijex3687 | 1953                     | NM               | ondansetron             | no     | 0                  | no       | 0                  |
| dijex3688 | 1959                     | NM               | ondansetron             | yes    | 3                  | no       | 0                  |
| dijex3697 | 1949                     | NM               | ondansetron             | no     | 0                  | no       | 0                  |
| dijex3700 | 1987                     | NM               | ondansetron             | no     | 0                  | no       | 0                  |
| dijex3715 | 1948                     | NM               | ondansetron             | no     | 0                  | no       | 0                  |
| dijex3728 | 1970                     | NM               | ondansetron             | no     | 0                  | no       | 0                  |
| dijex3734 | 1973                     | NM               | ondansetron             | yes    | 1                  | yes      | 3                  |
| dijex3740 | 1951                     | NM               | ondansetron             | yes    | 1                  | no       | 0                  |
| dijex3759 | 1944                     | NM               | ondansetron/granisetron | yes    | 1                  | no       | 0                  |
| dijex3792 | 1966                     | NM               | ondansetron             | no     | 0                  | no       | 0                  |
| dijex3799 | 1941                     | NM               | ondansetron             | no     | 0                  | no       | 0                  |
| dijex3807 | 1983                     | NM               | ondansetron             | yes    | 1                  | no       | 1                  |
| dijex3812 | 1969                     | NM               | ondansetron             | no     | 0                  | no       | 0                  |
| dijex3813 | 1963                     | NM               | ondansetron             | no     | 0                  | no       | 0                  |
| dijex3830 | 1956                     | NM               | ondansetron             | yes    | 1                  | no       | 1                  |
| dijex3850 | 1964                     | NM               | ondansetron             | yes    | 1                  | no       | 0                  |
| dijex3854 | 1945                     | NM               | ondansetron             | yes    | 1                  | no       | 0                  |
| dijex3873 | 1950                     | NM               | ondansetron             | no     | 0                  | no       | 0                  |
| dijex3879 | 1939                     | NM               | ondansetron             | no     | 0                  | no       | 0                  |
| dijex3884 | 1955                     | NM               | ondansetron             | yes    | 3                  | no       | 0                  |
| dijex3888 | 1946                     | NM               | ondansetron             | yes    | 1                  | no       | 0                  |
| dijex3894 | 1949                     | NM               | ondansetron             | no     | 0                  | no       | 0                  |
| dijex3905 | 1946                     | NM               | ondansetron             | yes    | 1                  | no       | 0                  |
| dijex3906 | 1969                     | NM               | ondansetron/granisetron | yes    | 1                  | no       | 0                  |
| dijex3921 | 1959                     | NM               | ondansetron             | yes    | 1                  | no       | 0                  |
| dijex3937 | 1956                     | NM               | ondansetron             | yes    | 2                  | no       | 0                  |
| dijex3941 | 1939                     | NM               | ondansetron             | yes    | 2                  | yes      | 1                  |
| dijex3942 | 1954                     | NM               | ondansetron             | yes    | 2                  | yes      | 1                  |
| dijex3944 | 1982                     | NM               | ondansetron             | no     | 0                  | no       | 0                  |
| dijex3964 | 1979                     | NM               | ondansetron             | yes    | 1                  | yes      | 1                  |
| dijex3970 | 1945                     | NM               | ondansetron             | no     | 0                  | no       | 0                  |
| dijex3971 | 1942                     | NM               | ondansetron             | yes    | 1                  | no       | 0                  |
| dijex3984 | 1938                     | NM               | ondansetron             | no     | 0                  | no       | 0                  |
| dijex4000 | 1949                     | NM               | ondansetron             | yes    | 1                  | no       | 0                  |

|           |      |    |             |     |   |     |   |
|-----------|------|----|-------------|-----|---|-----|---|
| dijex4002 | 1947 | NM | ondansetron | yes | 3 | yes | 4 |
| dijex4015 | 1950 | NM | ondansetron | yes | 3 | no  | 0 |
| dijex4021 | 1965 | NM | ondansetron | yes | 1 | yes | 1 |
| dijex4026 | 1944 | NM | ondansetron | no  | 0 | no  | 0 |
| dijex4031 | 1951 | NM | ondansetron | no  | 0 | no  | 0 |
| dijex4038 | 1950 | NM | ondansetron | no  | 0 | no  | 0 |
| dijex4047 | 1966 | NM | ondansetron | no  | 0 | no  | 0 |
| dijex4051 | 1955 | NM | ondansetron | yes | 1 | no  | 0 |
| dijex4053 | 1932 | NM | ondansetron | yes | 3 | yes | 4 |
| dijex4054 | 1949 | NM | ondansetron | yes | 2 | no  | 0 |
| dijex4057 | 1977 | NM | ondansetron | yes | 3 | yes | 2 |
